# Supplementary material for: Structural diversity and solvent-induced transformations of a copper-based metal–organic framework with highly aromatic ligands
Source: Royal Society of Chemistry journal article supplement (doi:10.1039/d4dt02085e), 2024-01-01
Supplement: d4dt02085e1.pdf [file d4dt02085e1.pdf]

**Supporting information for: Structural diversity and solvent-induced transformations of a copper-based metal-organic framework with highly aromatic ligand**

Abigail Edwards, Landon J. Elkins, Carla Slebodnick, Jinglei Wang, Qiang Zhang, and Tegan A. Makal

## Table of Contents

| Section | Content                               | Contains Figure | Page Range |
|---------|---------------------------------------|-----------------|------------|
| A       | Ligand Synthesis                      | N/A             | S3 – S4    |
| B       | NMR Spectra                           | S1-S16          | S5 – S12   |
| C       | Overview of MOF Synthesis             | S17-S19         | S13 – S14  |
| D       | Single-Crystal X-ray Experimental     | N/A             | S15-S17    |
| E       | MOF Structures                        | S20-S26         | S18-25     |
| F       | PXRD Data                             | S27-S33         | S26-S33    |
| G       | TGA Data                              | S34             | S34        |
| H       | Experimental gas Adsorption Isotherms | S35-S36         | S35-S36    |
| I       | IR Spectra                            | S37-S38         | S37-S38    |
| J       | References                            | N/A             | S39        |

## A. Ligand Synthesis

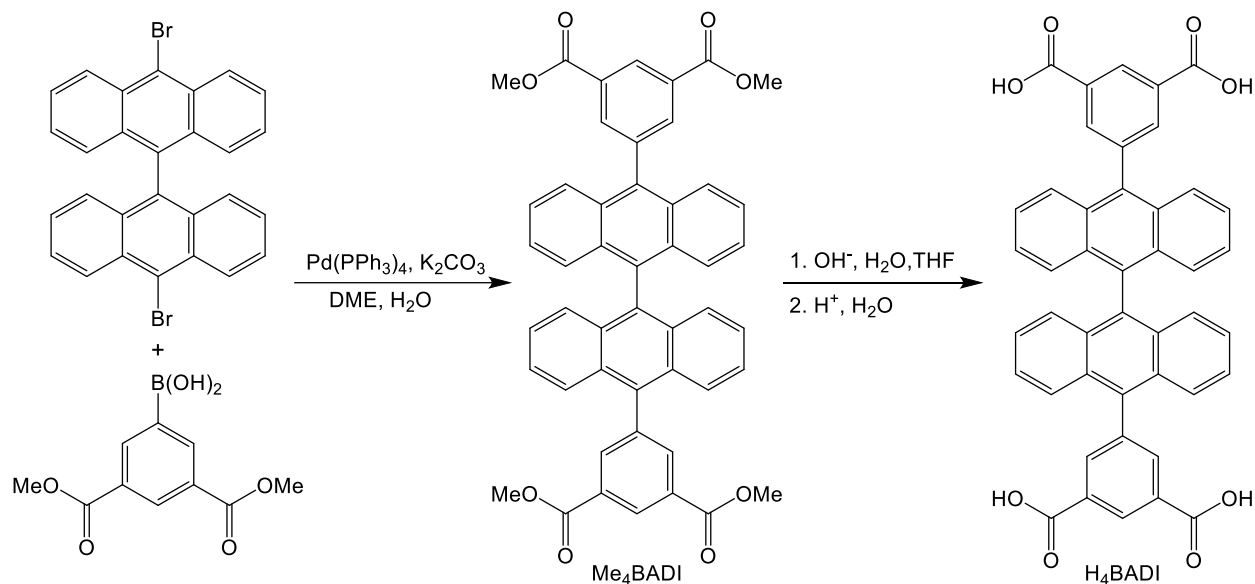

**Synthesis of tetramethyl 5,5'-([9,9'-bianthracene]-10,10'-diyl)diisophthalate ( $\text{Me}_4\text{BADI}$ )** To a 100-mL Schlenk flask equipped with magnetic stirrer was added 10,10'-dibromo-9,9'-bianthryl (1.998 g, 3.90 mmol), 3,5-bis(methoxycarbonyl)phenylboronic acid (3.718 g, 13.35 mmol), tetrakis(triphenylphosphine)palladium(0) (0.68 g, 0.59 mmol) and potassium carbonate (1.70 g, 12.3 mmol). The flask was purged and backfilled with argon three times before an argon-purged mixture of toluene, ethanol, and water (15:10:5 mL) was added via cannula. The rubber septum was replaced with reflux condenser, and the reaction mixture was heated at reflux under argon with stirring for six days. The organic solvent was then removed via rotary evaporator and the aqueous phase extracted with chloroform, dried over magnesium sulfate, filtered, and reduced in vacuo. The resultant solid was washed with acetone until the washings were colorless yielding a light-yellow solid that was subsequently dried in air (2.497 g, 87% yield). Found: C, 78.98; H, 4.89. Calc. for  $\text{C}_{48}\text{H}_{34}\text{O}_8$ : C, 78.04; H, 4.64%.  $^1\text{H}$  NMR (400 MHz,  $\text{CDCl}_3$ ):  $\delta$  (ppm) 8.97 (t, 2H,  $J = 1.6$  Hz), 8.53 (d, 4H,  $J = 1.6$  Hz), 7.67 (m, 4H), 7.37 (m, 4H), 7.27 (m, 4H), 7.24 (m, 4H), 4.01 (s, 12H).  $^{13}\text{C}$  NMR (100 MHz,  $\text{CDCl}_3$ ):  $\delta$  (ppm) 166.25, 140.00, 136.72, 135.27, 134.14, 131.28, 131.21, 130.18, 129.97, 127.22, 126.53, 125.93, 125.84, 52.55.

**Synthesis of 5,5'-([9,9'-bianthracene]-10,10'-diyl)diisophthalic acid ( $\text{H}_4\text{BADI}$ )** To a 100-mL round-bottomed flask was added  $\text{Me}_4\text{BADI}$  (2.497 g, 3.38 mmol) to a solution of potassium hydroxide (1.6 g in 40 mL THF/water, 1/1 v/v). The suspension was heated at reflux with stirring in air for 24 hours. The mixture was then cooled and filtered to remove black precipitate and THF removed via rotary evaporator. Aqueous HCl (10%) was then added to the resultant aqueous solution to precipitate  $\text{H}_4\text{BADI}$  as a yellow solid, which was subsequently collected via vacuum filtration, washed with water, and dried in air at 110  $^\circ\text{C}$  (2.286 g, 99% yield). Found: C, 76.37; H, 4.06. Calc. for  $\text{C}_{44}\text{H}_{26}\text{O}_8$ : C, 77.41; H, 3.84%.  $^1\text{H}$  NMR (400 MHz,  $\text{DMSO-d}_6$ ):  $\delta$  (ppm) 13.50 (s, 4H), 8.76 (t, 2H,  $J = 1.6$  Hz), 8.38 (d, 4H,  $J = 1.6$  Hz), 7.65 (d, 4H,  $J = 8.8$  Hz), 7.47 (m, 4H), 7.28 (m, 4H), 7.15 (d, 4H,  $J = 8.8$  Hz).  $^{13}\text{C}$  NMR (100 MHz,  $\text{DMSO-d}_6$ ):  $\delta$  (ppm) 166.60, 139.02, 135.70, 135.36, 133.35, 132.19, 130.68, 129.55, 129.43, 126.68, 126.33, 126.27, 126.21.

**Synthesis of tetramethyl 5,5'-([1,1'-binaphthalene]-4,4'-diyl)diisophthalate (Me<sub>4</sub>BNDI)** To a 100-mL Schlenk flask was added 4,4'-dibromo-1,1'-binaphthalene (1.609 g, 3.90 mmol), 3,5-bis(methoxycarbonyl)phenylboronic acid (3.740 g, 15.71 mmol), tetrakis(triphenylphosphine)palladium(0) (0.68 g, 0.59 mmol), and potassium carbonate (1.60 g, 11.7 mmol). The flask was evacuated and backfilled with argon three times. A mixture of toluene/ethanol/water (15/10/5 mL) was bubbled with argon and then transferred to the reaction flask via cannula. The reaction mixture was heated at reflux with stirring for five days. The organic solvent was then removed via rotary evaporator and the aqueous phase extracted with chloroform, dried over magnesium sulfate, filtered, and reduced in vacuo. The resultant solid was washed with acetone until the washings were colorless yielding a white solid that was subsequently dried in air (2.091 g, 84% yield).

**Synthesis of 5,5'-([1,1'-binaphthalene]-4,4'-diyl)diisophthalic acid (H<sub>4</sub>BNDI)** To a 100-mL round-bottomed flask was added Me<sub>4</sub>BNDI (2.091 g, 3.24 mmol) to a solution of potassium hydroxide (1.6 g in 40 mL THF/water, 1/1 v/v). The suspension was heated at reflux with stirring in air for 24 hours. The mixture was then cooled and filtered to remove black precipitate and THF removed via rotary evaporator. Aqueous HCl (10%) was then added to the resultant aqueous solution to precipitate H<sub>4</sub>BNDI as a yellow solid, which was subsequently collected via vacuum filtration, washed with water, and dried in air at 110 °C (1.660 g, 87% yield).

## B. NMR Spectra

### Me<sub>4</sub>BADI <sup>1</sup>H NMR

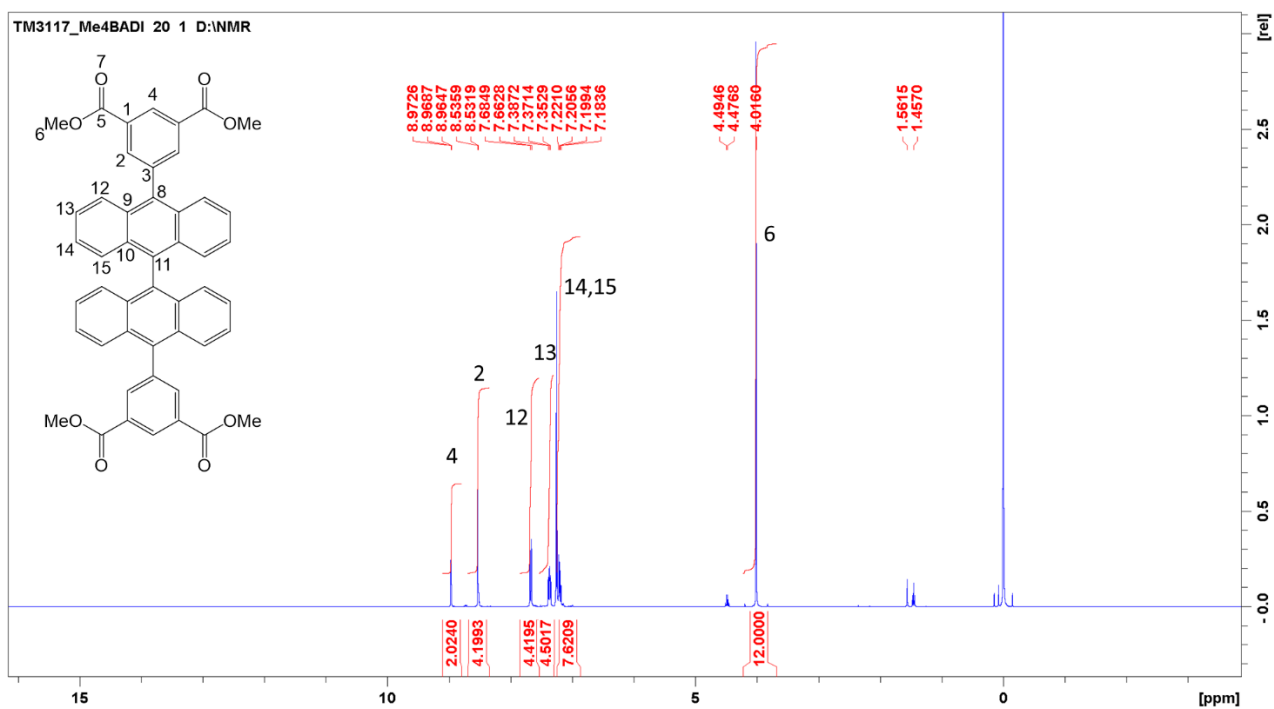

Figure S1 <sup>1</sup>H NMR spectrum (full-range) of Me<sub>4</sub>BADI in CDCl<sub>3</sub>

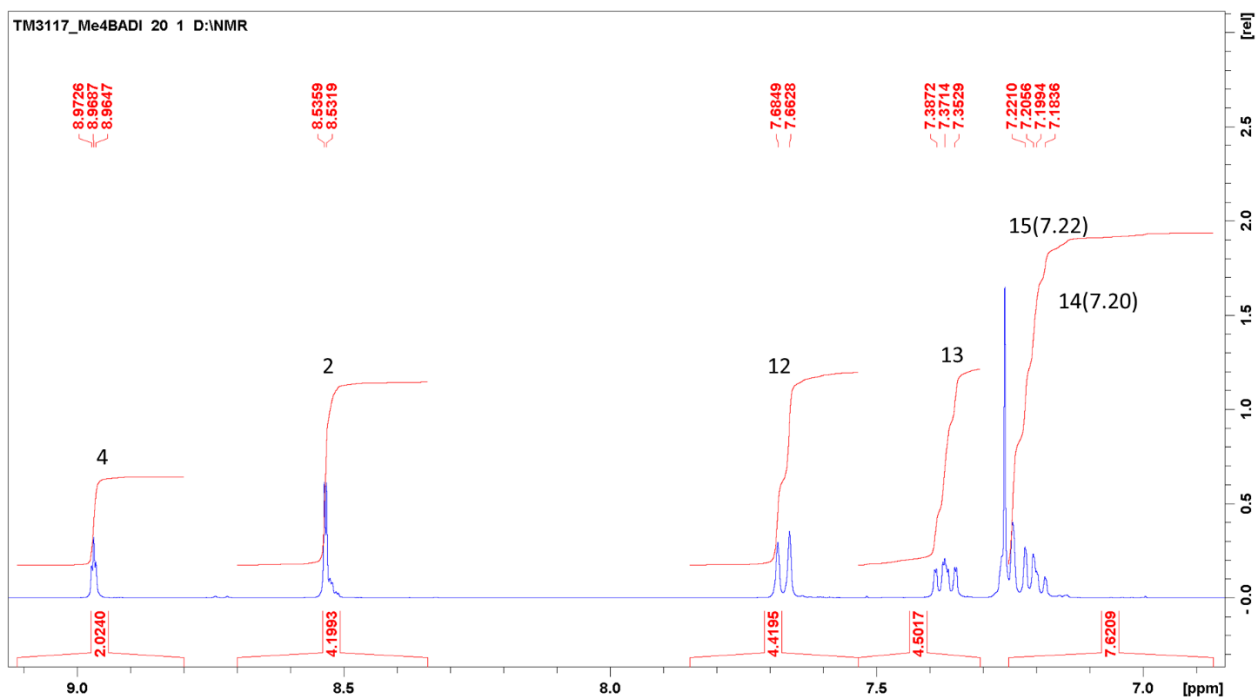

Figure S2 <sup>1</sup>H NMR spectrum (zoom) of Me<sub>4</sub>BADI in CDCl<sub>3</sub>

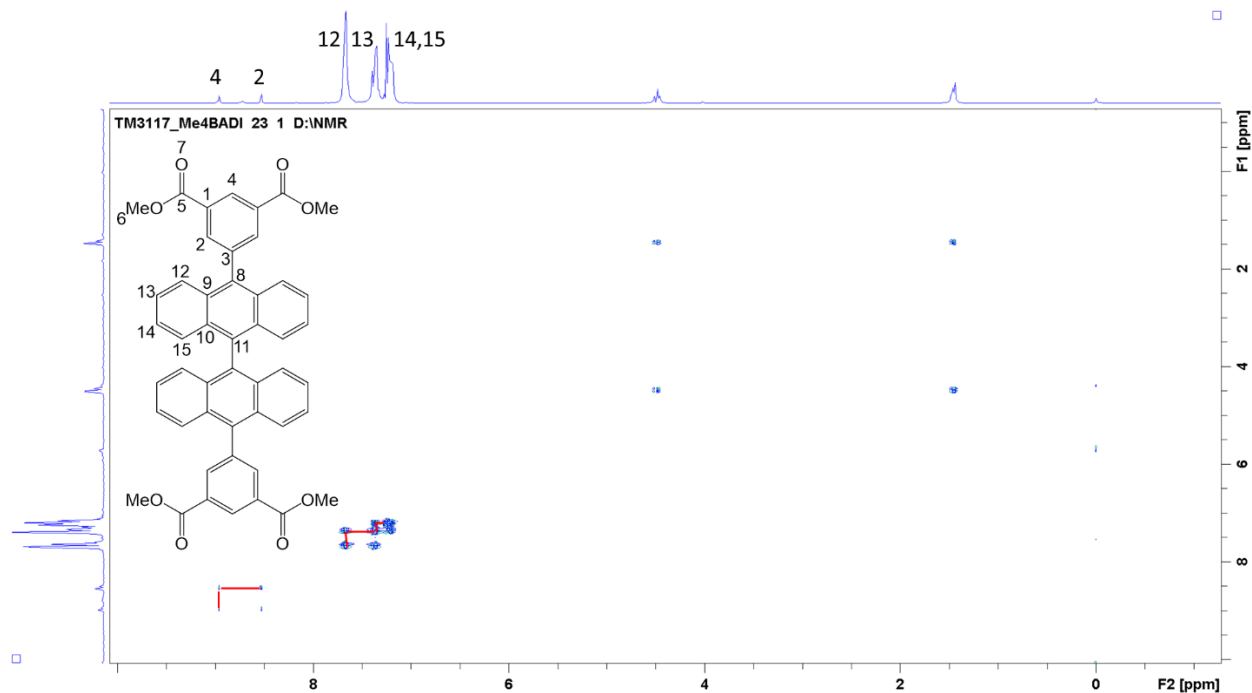

Figure S3  $^1\text{H}$ - $^1\text{H}$  COSY spectrum of Me<sub>4</sub>BADI in CDCl<sub>3</sub>

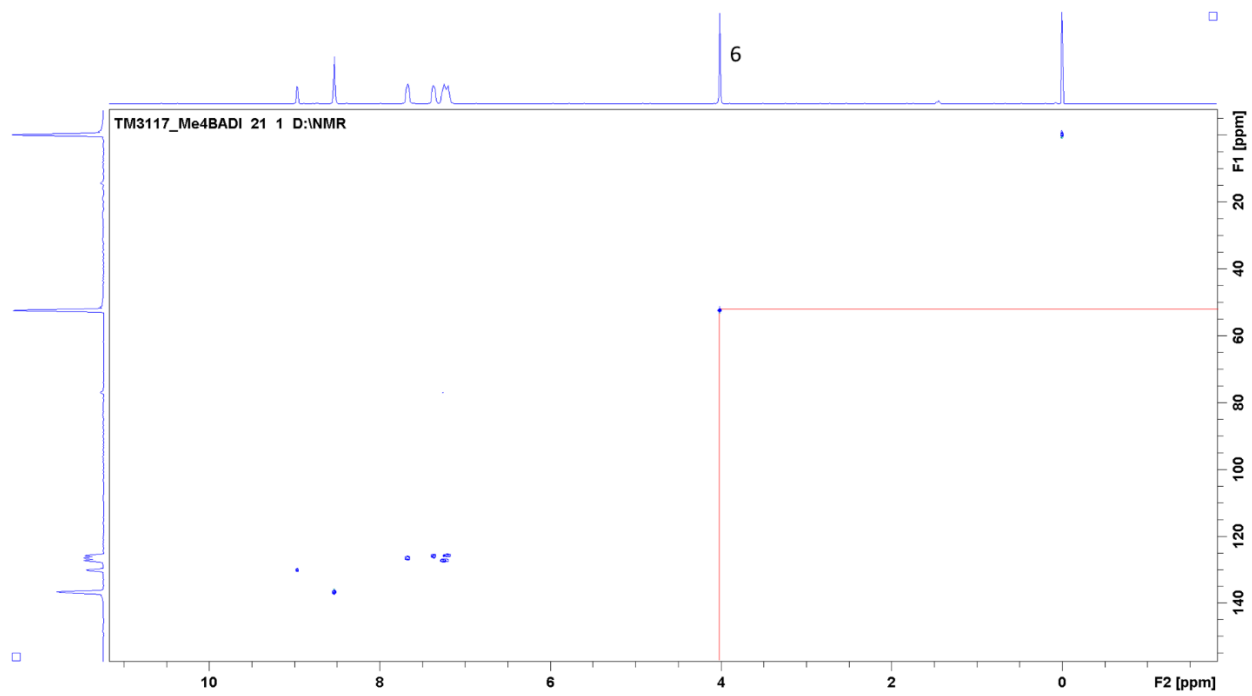

Figure S4  $^1\text{H}$ - $^{13}\text{C}$  HSQC spectrum (full range) of Me<sub>4</sub>BADI in CDCl<sub>3</sub>

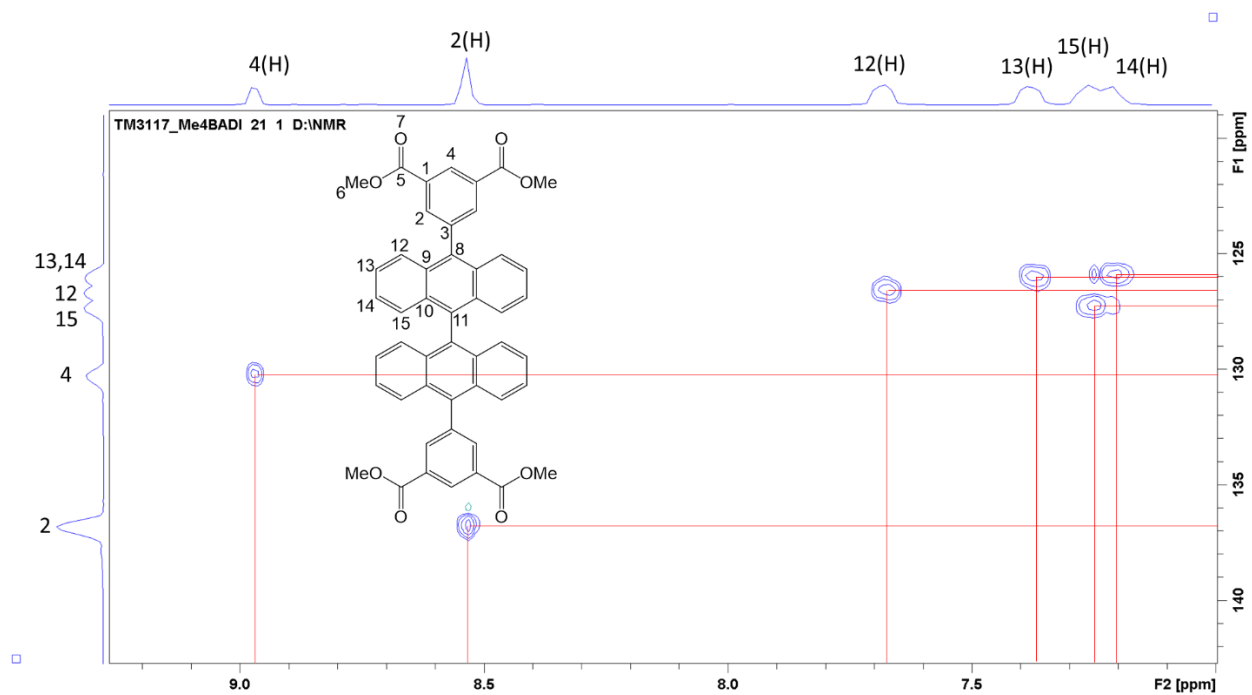

Figure S5  $^1\text{H}$ - $^{13}\text{C}$  HSQC spectrum (zoom) of Me<sub>4</sub>BADI in CDCl<sub>3</sub>

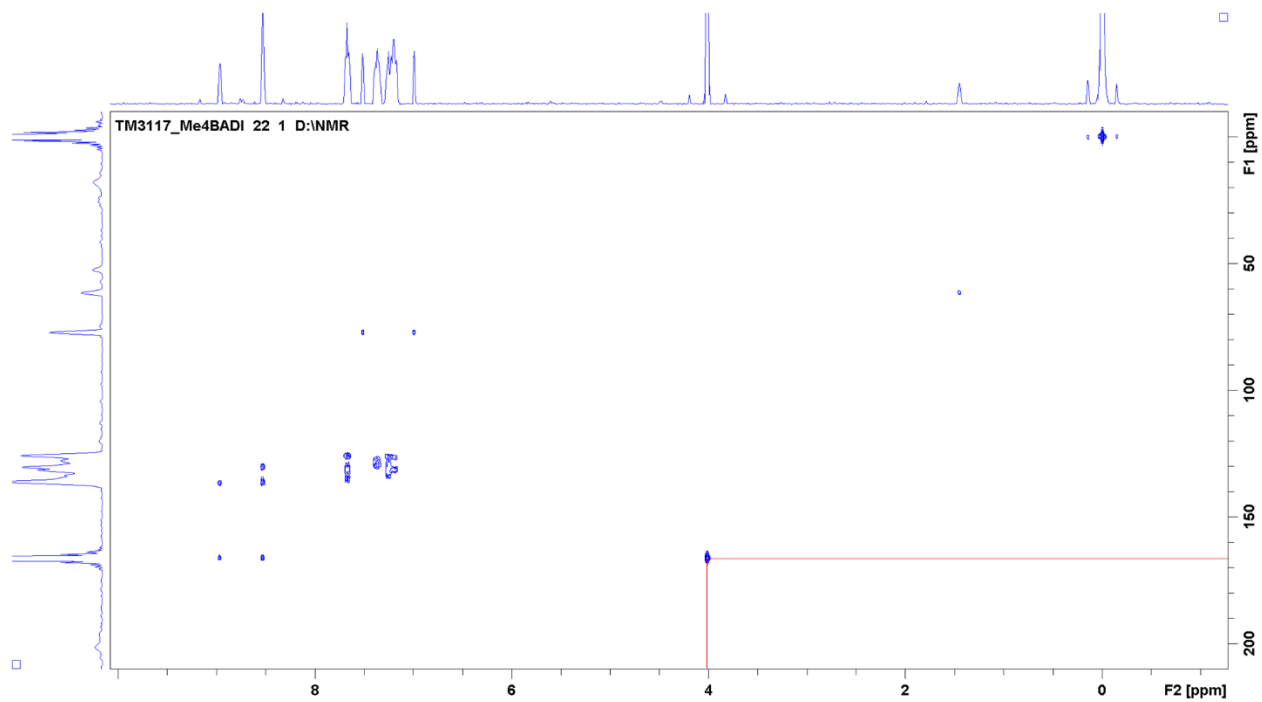

Figure S6  $^1\text{H}$ - $^{13}\text{C}$  HMBC spectrum (full range) of Me<sub>4</sub>BADI in CDCl<sub>3</sub>

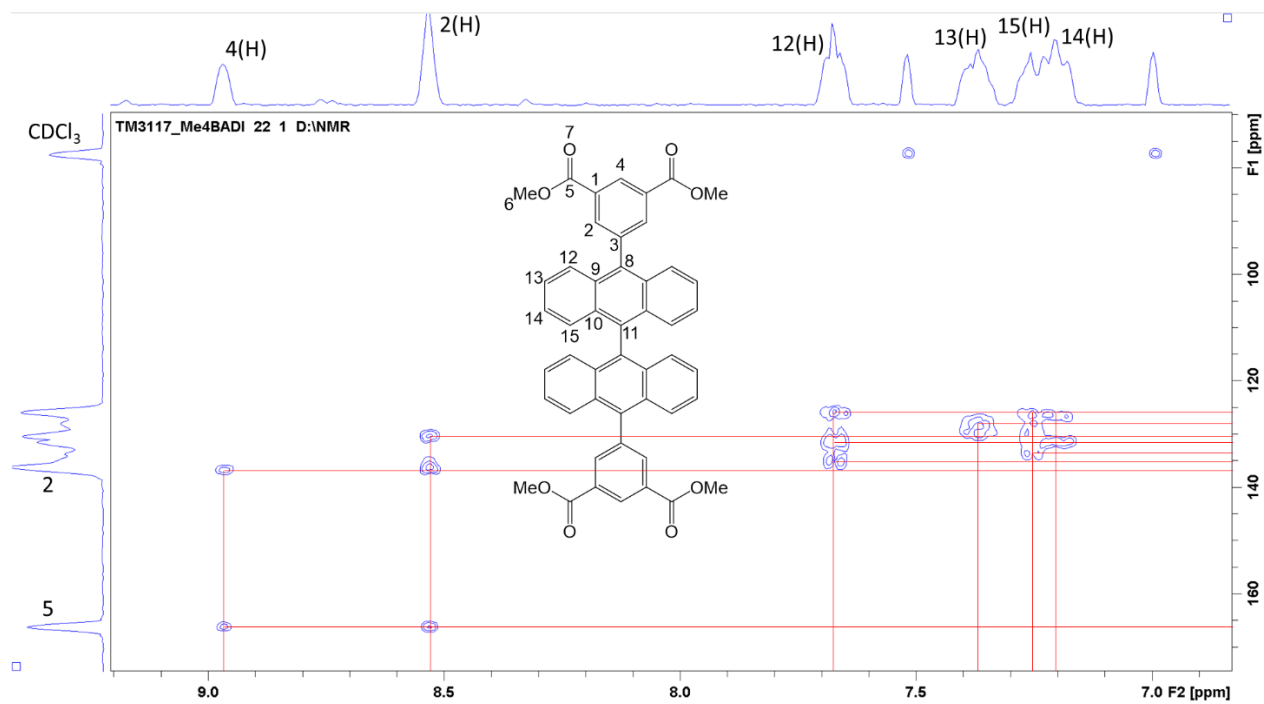

Figure S7  $^1\text{H}$ - $^{13}\text{C}$  HMBC spectrum (zoom) of Me<sub>4</sub>BADI in CDCl<sub>3</sub>

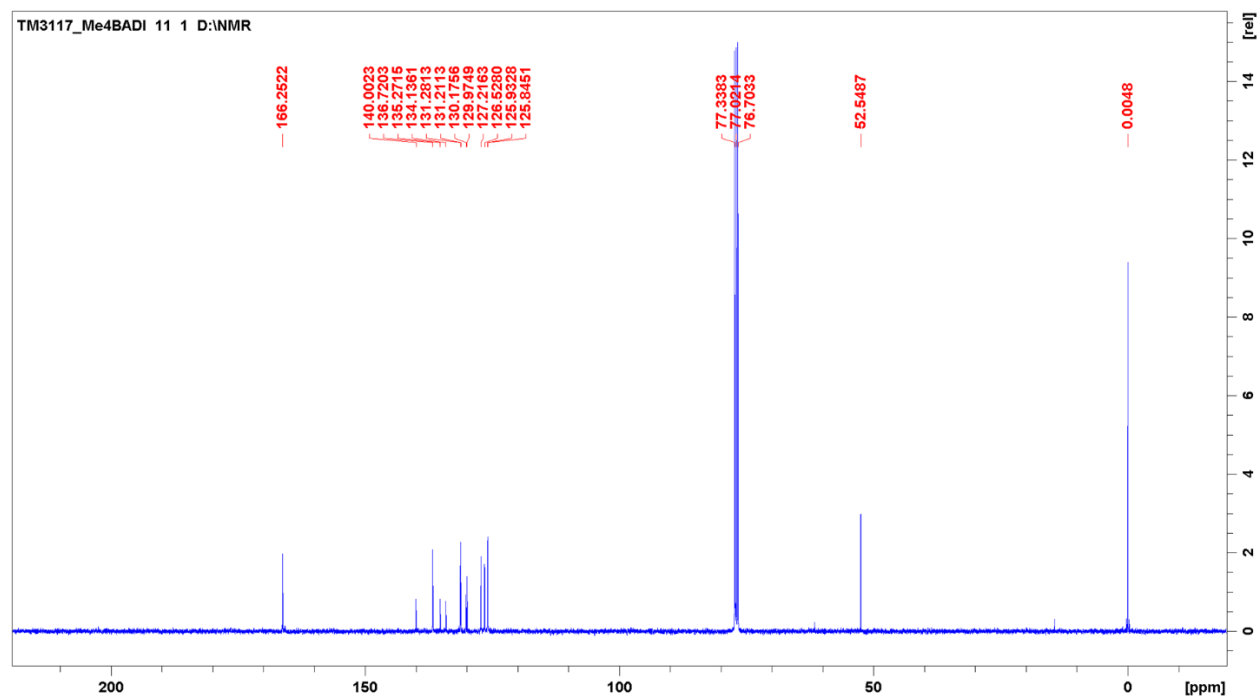

Figure S8  $^{13}\text{C}$  spectrum of Me<sub>4</sub>BADI in CDCl<sub>3</sub>



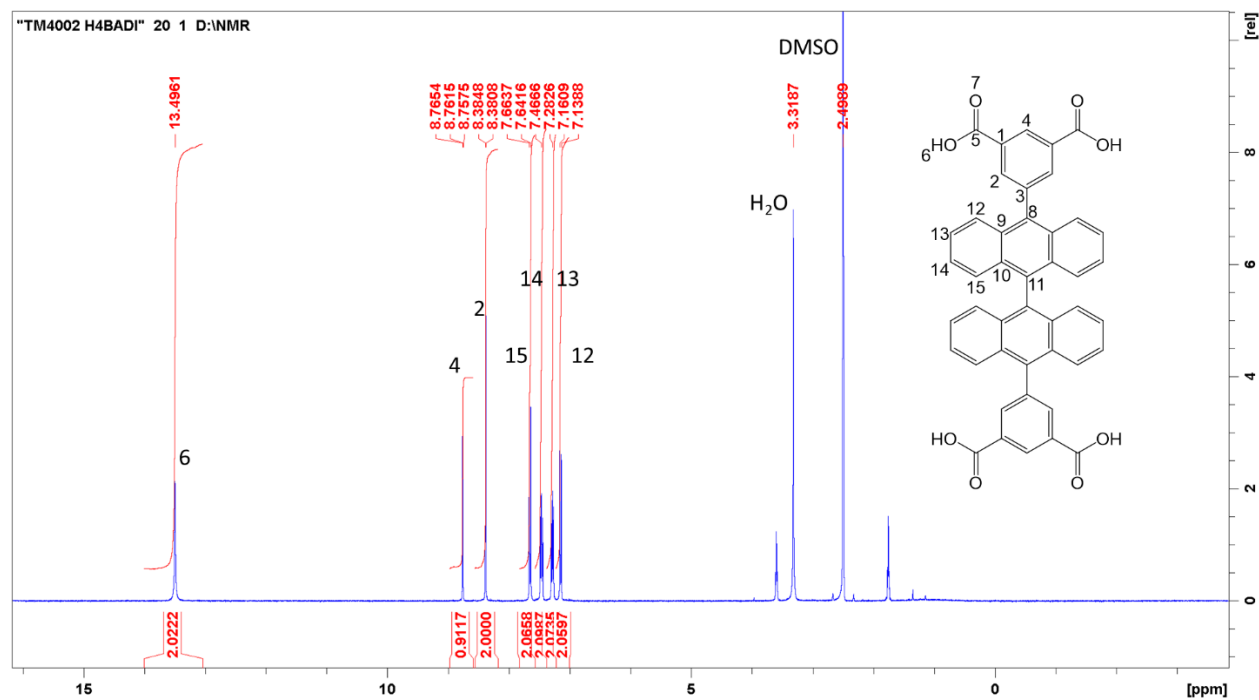

Figure S9 <sup>1</sup>H NMR spectrum (full-range) of H<sub>4</sub>BADI in DMSO-d<sub>6</sub>

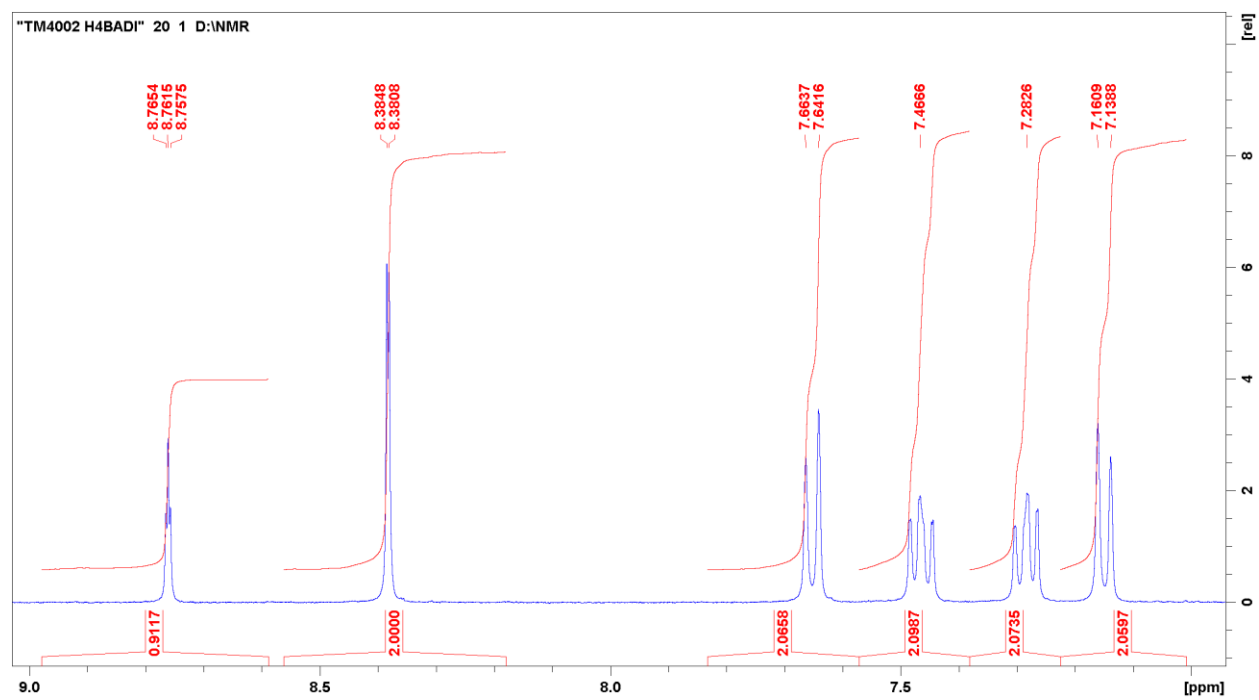

Figure S10 <sup>1</sup>H NMR spectrum (zoom) of H<sub>4</sub>BADI in DMSO-d<sub>6</sub>

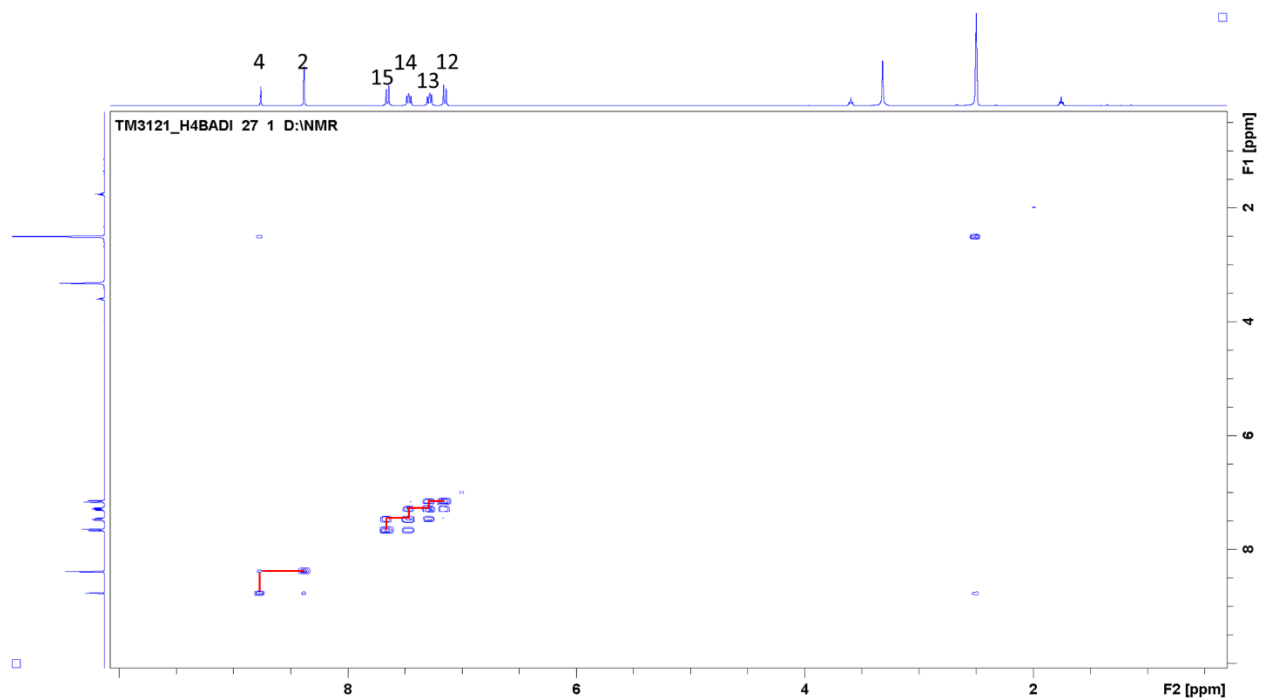

**Figure S11**  $^1\text{H}$ - $^1\text{H}$  COSY spectrum of H<sub>4</sub>BADI in DMSO

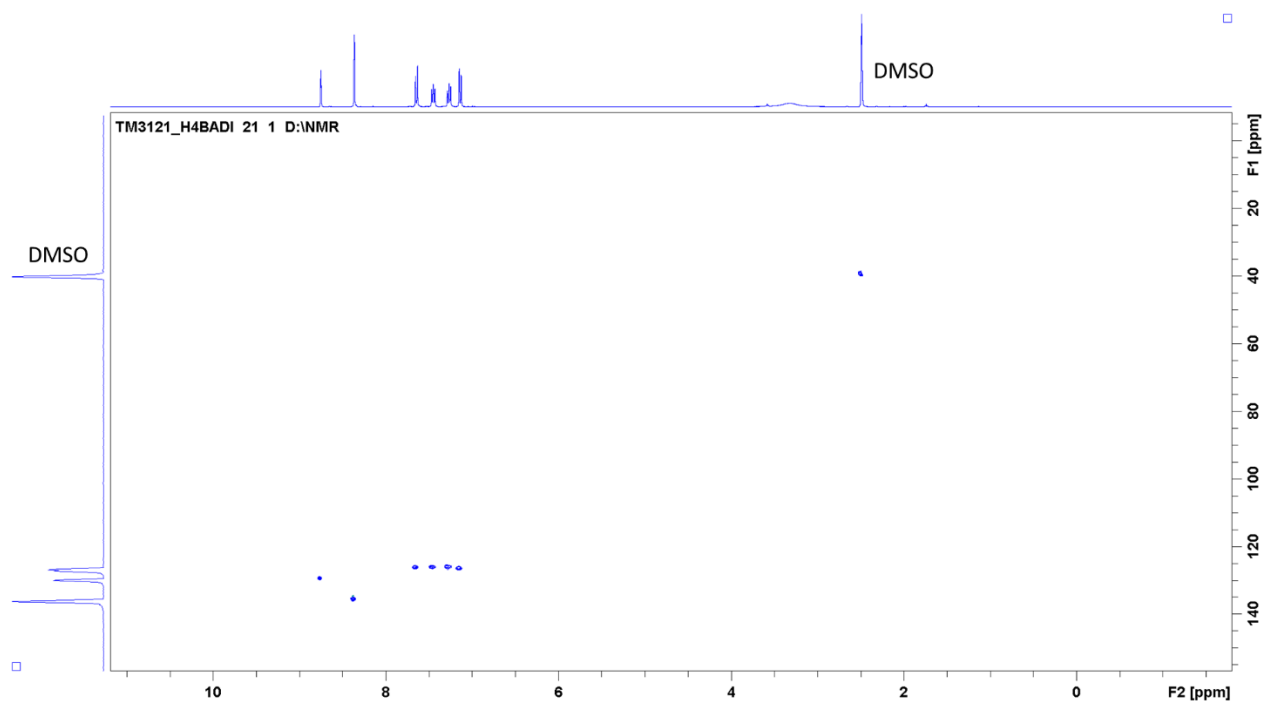

**Figure S12**  $^1\text{H}$ - $^{13}\text{C}$  HSQC spectrum (full range) of H<sub>4</sub>BADI in DMSO- $d_6$

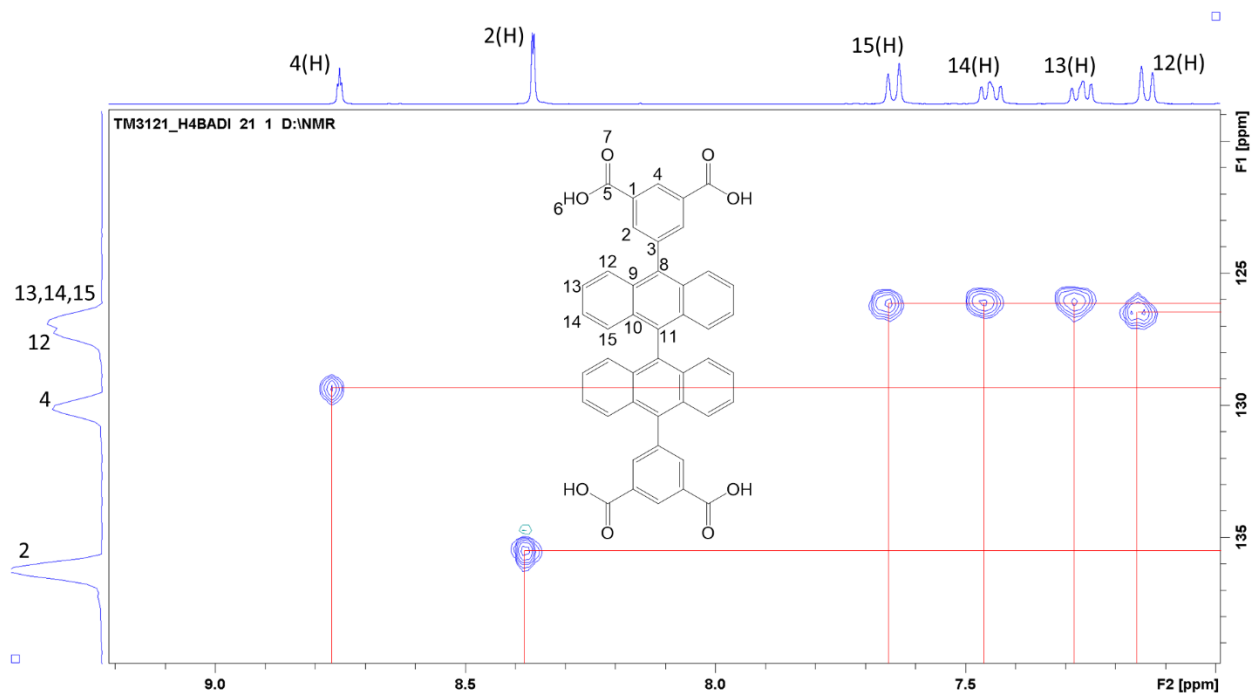

Figure S13  $^1\text{H}$ - $^{13}\text{C}$  HSQC spectrum (zoom) of H<sub>4</sub>BADI in DMSO-d<sub>6</sub>

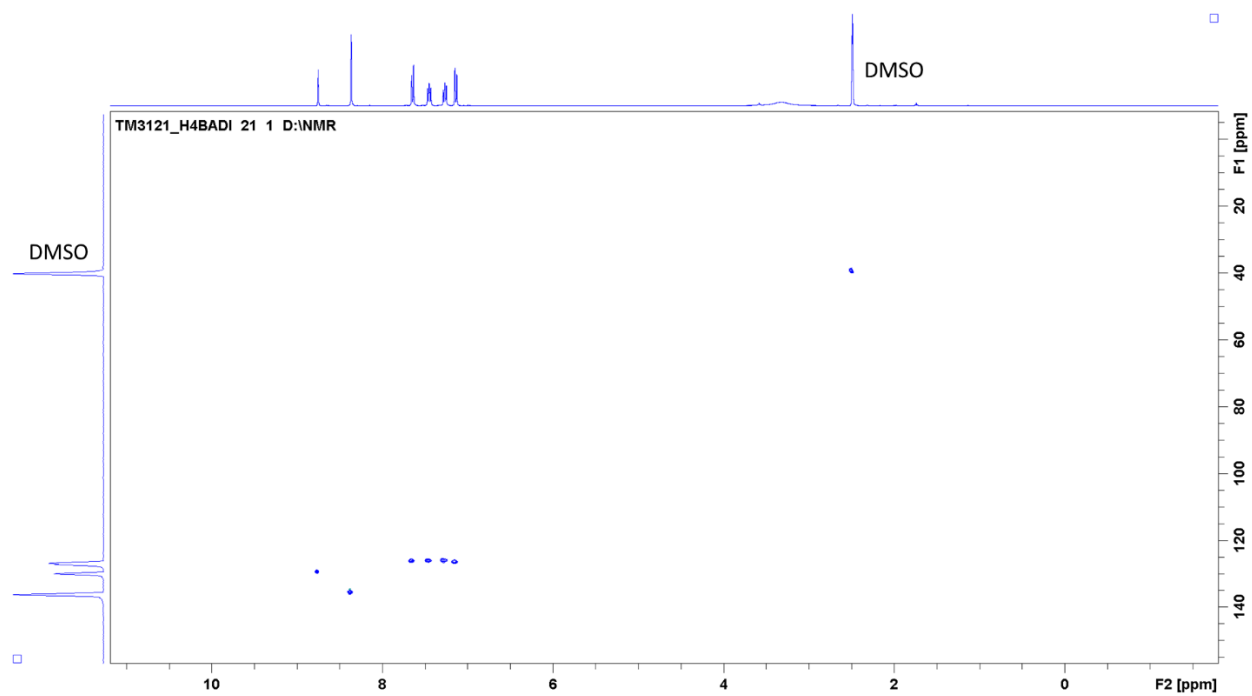

Figure S14  $^1\text{H}$ - $^{13}\text{C}$  HMBC spectrum (full range) of H<sub>4</sub>BADI in DMSO-d<sub>6</sub>

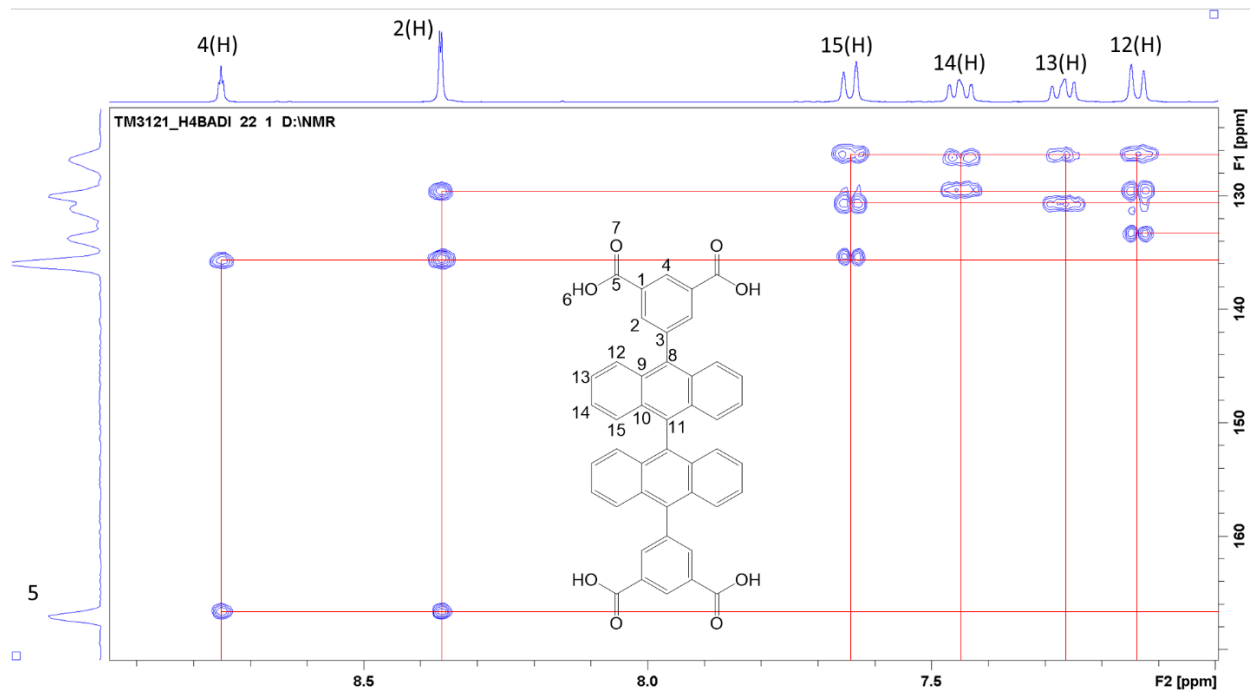

Figure S15  $^1\text{H}$ - $^{13}\text{C}$  HMBC spectrum (zoom) of H<sub>4</sub>BADI in DMSO-d<sub>6</sub>

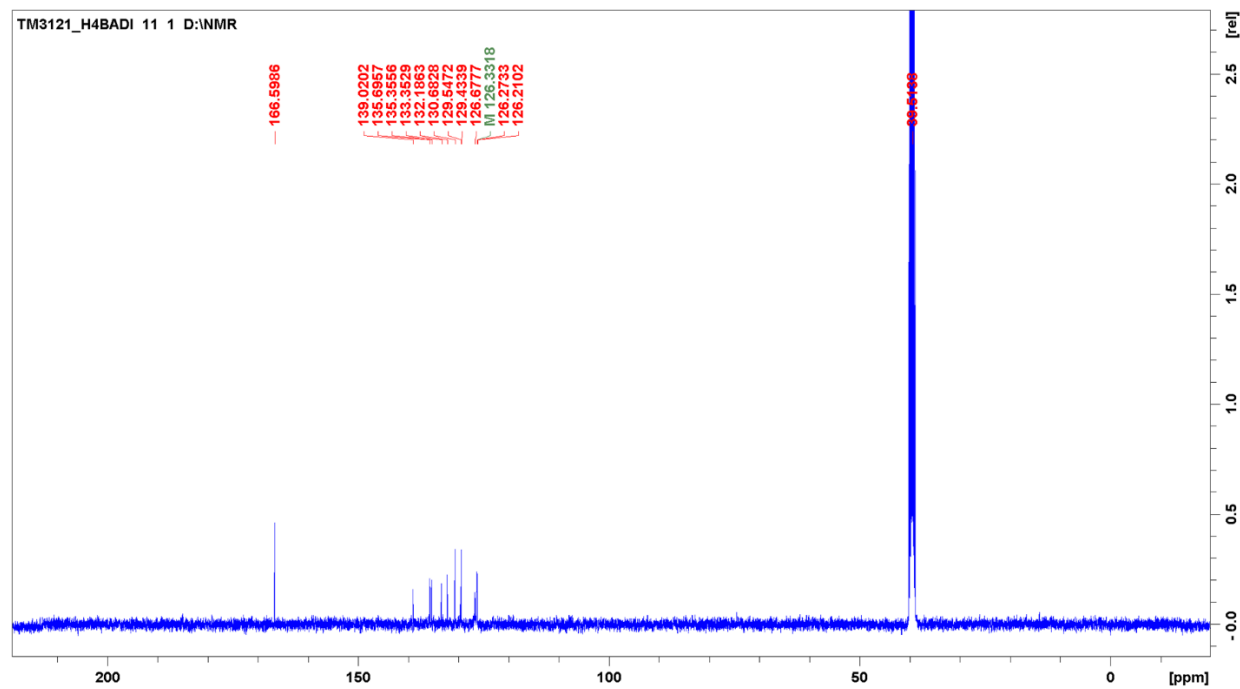

Figure S16  $^{13}\text{C}$  spectrum of H<sub>4</sub>BADI in DMSO-d<sub>6</sub>

### C. Overview of MOF Synthesis

Synthetic conditions for MOF preparation were initially investigated in 1-dram vials with 1.5 mL solvent. For all screening syntheses, 5 mg ligand precursor ( $H_4BADI$  or  $H_4BNDI$ ) was combined with 5 mg  $Cu(NO_3)_2 \cdot 2.5H_2O$ . Solvent (DMF, DMA, or DEF, 1.5 mL) was then added, followed by tetrafluoroboric acid ( $HBF_4$ , 50 – 200  $\mu L$ ). [Note: All synthetic attempts excluding  $HBF_4$  from the reaction mixture resulted in observation of amorphous precipitate.] The mixture was then sonicated to dissolve, sealed with plastic screw cap, and subsequently heated at 85 °C in a digitally-controlled oven. Synthetic attempts in DMF and DEF regularly resulted in observation of  $Cu(0)$  before or concurrently with the formation of MOF, so syntheses (in oven) with DMF or DEF were eventually all conducted in uncapped vials.

Small scale reactions resulting in observation of MOF crystallites were scaled 10-fold in 20-mL scintillation vials. For these reactions, 50 mg ligand precursor ( $H_4BADI$  or  $H_4BNDI$ ) was combined with 50 mg  $Cu(NO_3)_2 \cdot 2.5H_2O$ . Solvent (DMF or DMA, 15 mL) was then added, followed by  $HBF_4$  (500 – 2000  $\mu L$ ). The reaction mixture was then sonicated to dissolve, sealed with Teflon-lined plastic screw cap, and heated at 85 °C in a digitally-controlled oven. For any of these scaled reactions the screw cap was removed at the first observation of  $Cu(0)$  formation. Eventually, all reactions involving any volume of DMF were conducted in uncapped vials.  $Cu(0)$  formation was also observed in all reactions in DMA that were heated longer than 48 h. No attempts to scale-up syntheses involving DEF were conducted.

Large-batch synthesis of  $Cu_2BADI$ -DMF was accomplished by dissolving (with sonication) 250 mg  $H_4BADI$  and 250 mg  $Cu(NO_3)_2 \cdot 2.5H_2O$  in 75 mL DMF and 2.5 mL  $HBF_4$  in a 150-mL beaker and heating (uncovered or loosely covered with a watch glass) at 85 °C in an oven for 2 days. The solid was collected via vacuum filtration, washed with fresh DMF, and dried in air (0.47 g, average of 3 trials).

ZJU-105 was isolated from all reactions between  $H_4BNDI$  and  $Cu(NO_3)_2 \cdot 2.5H_2O$ , regardless of solvent (DMA or DMF) and volume of  $HBF_4$  (5 – 20  $\mu L$ , small scale). Syntheses in DMF resulted in crystal forms optically comparable to what was previously reported<sup>1</sup> (**Figure S17**), whereas syntheses in DMA resulted in crystal forms comparable to those more typically observed for **nbo**-type CuMOFs constructed from isophthalate-containing tetracarboxylates (**Figure S18**) (for example, see PCN-46 in Ref<sup>1</sup>, and NOTT-101 and ZJNU-80 in Ref<sup>2</sup>). ZJU-105 could also be prepared as a fine powder in a fume hood with stirring in oil bath held at 85 °C for 48 h. To avoid co-formation of  $Cu(0)$ , the reaction vial was capped with rubber septum and vent needle (20G) inserted to allow introduction of air. Heating the reaction mixture in a completely open vial resulted in evaporation of all solvent and isolation of amorphous solid.

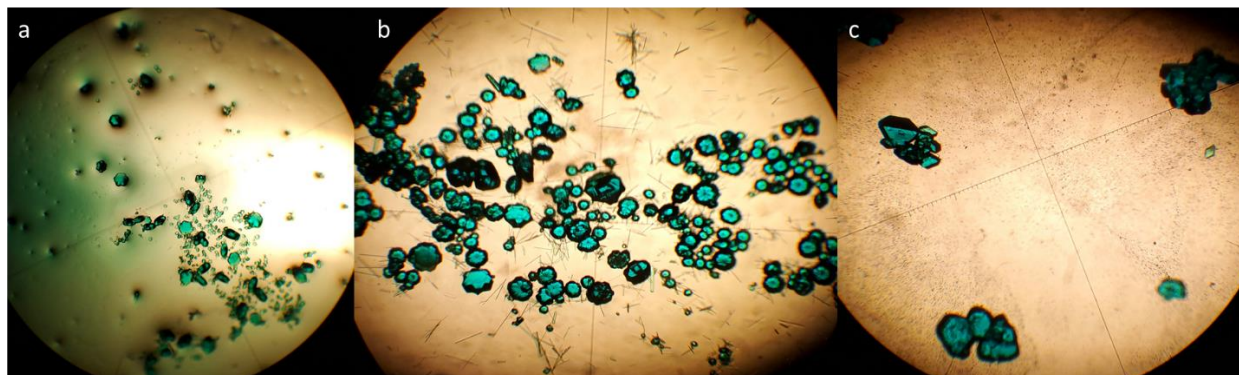

**Figure S17** Optical microscopy images of ZJU-105 synthesized in DMF (85 °C): **a** 30/1, **b** 15/1, and **c** 7.5/1 v/v DMF/HBF<sub>4</sub>

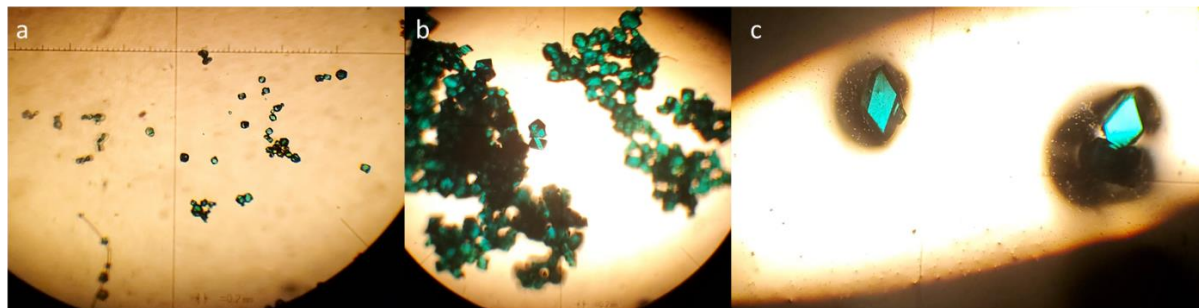

**Figure S18** Optical microscopy images of ZJU-105 synthesized in DMA (85 °C): **a** 30/1, **b** 15/1, and **c** 7.5/1 v/v DMA/HBF<sub>4</sub>

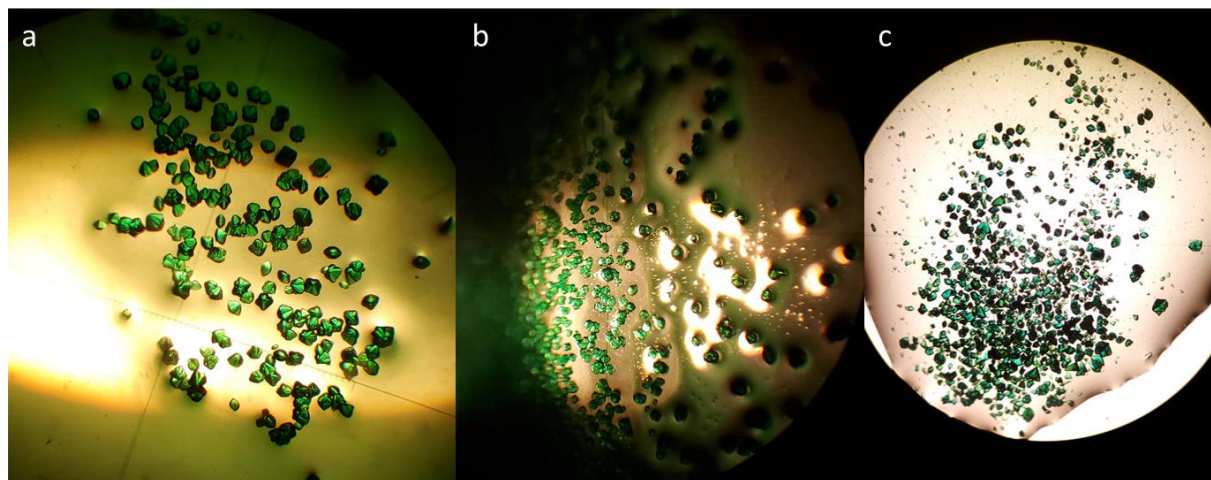

**Figure S19** Optical microscopy image of Cu<sub>2</sub>BADI-S: **a** DMF, **b** DMA, and **c** DEF

#### Alternative Synthesis of ZJU-105 (Single-crystals)

To a 20-mL scintillation vial was added H<sub>4</sub>BNDI (0.050 g, 0.086 mmol), Cu(NO<sub>3</sub>)<sub>2</sub>·2.5H<sub>2</sub>O (0.050 g, 0.21 mmol), and DMA (15 mL), followed by addition of HBF<sub>4</sub> (2000 μL). The vial was capped and then heated at 85 °C in an oven for 48 hours. The resultant blue crystalline material of ZJU-105 was decanted and washed with fresh DMA. Yield: 90 mg

#### Alternative Synthesis of ZJU-105 (Bulk powder)

To a 20-mL scintillation vial equipped with Teflon-coated magnetic stir bar was added H<sub>4</sub>BNDI (0.050 g, 0.086 mmol), Cu(NO<sub>3</sub>)<sub>2</sub>·2.5H<sub>2</sub>O (0.050 g, 0.21 mmol), and DMF (15 mL), followed by addition of HBF<sub>4</sub> (1000 μL). The vial was sealed with rubber septum and a vent needle (20G) added. The reaction was heated at 85 °C in an oil bath with constant stirring for 48 hours. The resultant blue-green crystalline material of ZJU-105 was decanted and washed with fresh DMF. Yield: 87 mg

#### Addressing Cu(0) Formation

One of the significant challenges in the preparation of novel Cu-MOFs is the prevention or remediation of Cu(0) formation during synthesis. Owing to the presence of redox-active ligands<sup>3-6</sup> and/or in situ formation of reducing agents from solvent decomposition<sup>7,8</sup>, attempted solvothermal syntheses of Cu-MOF can often result in precipitation of Cu(0). Generally, once copper metal is observed, the MOF chemist scraps the synthesis and attempts to tune reaction conditions by modifying the quantity of acid added to the reaction mixture, time of reaction, or other parameters. Alternatively, density gradients may sometimes be used to separate the Cu(0) from the desired MOF. These methods can be exceptionally tedious and time-consuming. Previous work from Jiang, et al<sup>9</sup> demonstrated that the continued introduction of air into a stirred MOF reaction involving redox-active ligand and Cu(II) can prevent the formation of elemental copper; however, for applications requiring larger particle sizes or for MOFs that cannot be prepared with stirring, the elimination of Cu(0) from isolated MOF product remains a challenge. To this end, we explored additional methods and modifications of those presented by Jiang, et al for remediation of Cu(0) formation during MOF synthesis. Through our investigations we have identified two alternatives to the strategies mentioned above.

Firstly, while observation of Cu(0) in a vial containing MOF is typically perceived as the “kiss of death” for the sample, we found that the Cu(0) present in many of our reaction vials containing MOF crystals can be oxidized through simply leaving the vials uncapped under laboratory conditions. Encouraged by this observation, we questioned if the oxygenation of the solution during the reaction could serve to oxidize any Cu(0) formed. We explored three variations of this experiment: (1) bubbling air into the reaction solutions prior to heating, (2) increasing the headspace above solutions in the vials, and (3) open-vial reactions. Through our studies, we found that oxygenating the solvent prior to synthesis and increasing the headspace (replacing 20-mL vial with 50-mL vial while keeping all other synthetic conditions the same) were both insufficient to prevent the formation of Cu(0).

Comparable to previous reports<sup>9</sup>, we found that for reactions that are prone to forming Cu(0) in sealed reactions, continuous exposure to air prevented Cu(0) formation. In particular, we found that the preparation of **1**-DMF and -DEF in a sealed vial in an oven always resulted in isolation of Cu(0) in addition to crystalline MOF. Unlike what was reported by Jiang, et al<sup>9</sup>, we found that stirring the reaction solutions in open vials was unnecessary; simply leaving the vial unsealed during synthesis was adequate. In the Jiang, et. al. report, the stirring was necessary because a solid MOF film forms at the reaction/air interface, reducing oxygen permeation to the bulk reaction mixture where the reaction was taking place. For the MOFs presented in this report, no solid film forms to impede oxygen permeation. Similarly, the preparation of bulk ZJU-105 powder in a sealed vial with stirring also resulted in formation of both Cu(0) and the desired MOF. Conducting the stirred-synthesis of ZJU-105 in an open vial was unsuccessful, owing to the complete evaporation of solvent during the reaction process. To minimize the loss of solvent, we reduced the opening aperture by sealing the vial with rubber septum and introducing a vent needle (20G) to allow for the introduction of air. This method effectively produces ZJU-105 as a microcrystalline powder while completely eliminating the co-isolation of Cu(0).

Observation of Cu(0) was uncommon in the preparation of **1**-DMA, except when the reaction mixture was heated for greater than 48 h. In such cases, the Cu(0) could be oxidized by storing the sample uncapped in its mother liquor under normal laboratory conditions for several days to weeks, depending on the amount of Cu(0) present. Heating the sample (uncapped) at 85 °C accelerated the rate of Cu(0) oxidation.

## D. Single-Crystal X-ray Experimental

### 1-DMA X-ray Experiment

A blue prism (0.04 x 0.07 x 0.09 mm<sup>3</sup>) was centered on the goniometer of a Rigaku Oxford Diffraction Synergy-S diffractometer equipped with a HyPix6000HE detector and operating with CuK $\alpha$  radiation. The data collection routine, unit cell refinement, and data processing were carried out with the program CrysAlisPro.<sup>10</sup> The Laue symmetry and systematic absences were consistent with the monoclinic space group  $P2_1/n$ . The structure was solved using SHELXT<sup>11</sup> and refined using SHELXL<sup>12</sup> via Olex2.<sup>13</sup> During the preliminary refinements, there was evidence of three disordered DMA molecules in the asymmetric unit; effort to model this disorder was unsuccessfully, presumably due to significant dynamic disorder with the structure cavities. Therefore, the solvent mask feature of OLEX2 was used. a total of 139.5 e<sup>-</sup> (3 DMA molecules = 144 e<sup>-</sup>) was subtracted from a void space of 499 Å<sup>3</sup> per asymmetric unit (558 e<sup>-</sup> and 1996 Å<sup>3</sup> per unit cell). The final refinement model involved anisotropic displacement parameters for non-hydrogen atoms and a riding model for all hydrogen atoms.

### 1-DMF X-ray Experiment

An irregular shaped crystal (0.11 x 0.19 x 0.24 mm<sup>3</sup>) was cut from a blue prism and centered on the goniometer of a Rigaku Oxford Diffraction Synergy-S diffractometer equipped with a HyPix6000HE detector and operating with MoK $\alpha$  radiation. The data collection routine, unit cell refinement, and data processing were carried out with the program CrysAlisPro.<sup>10</sup> The Laue symmetry and systematic absences were consistent with the orthorhombic space group  $Cccm$  (#63). However, in this space group, there were systematically weak reflection suggesting a superlattice and the preliminary structure model showed significant disorder with unreasonable steric interactions. Upon more careful analysis of the diffraction data, a monoclinic nonmerohedral twin was identified (twin law 180° rotation about [001]) that accounted for the majority of the systematically weak reflection. During structure refinement on the HLKf 5 twin data, the twin ratios refined to approximately 50/50 (0.516(2) and 0.484(2)) accounting for the pseudo orthorhombic symmetry.

The structure was solved in space group  $P2/c$  (#13) using SHELXT<sup>11</sup> and refined using SHELXL<sup>12</sup> via Olex2.<sup>13</sup> Unlike the  $Cccm$  model, the BADI<sup>4-</sup> ligand is fully ordered in  $P2/c$ . The capping ligands of the paddlewheel complex are modeled as water but are likely a combination of water and DMF based on the presence of multiple difference electron density peaks near the coordinated oxygen. Attempt to model partial DMF occupancy at this site were unsuccessful—presumably the DMF is in dynamic motion. There is also evidence of multiple disordered DMF molecules in the solvent cavities. Using the solvent mask feature of OLEX2, a total of 893 e<sup>-</sup>, equivalent to ~22 DMF molecules (880 e<sup>-</sup>) was subtracted from 3665 Å<sup>3</sup> total void space per unit cell, or ~5.5 DMF per asymmetric unit (223 e<sup>-</sup>/916 Å<sup>3</sup>). The final refinement model involved anisotropic displacement parameters for non-hydrogen atoms and a riding model for all hydrogen atoms.

### 1-DMSO X-ray Experiment

A blue plate (0.02 x 0.07 x 0.15 mm<sup>3</sup>) was centered on the goniometer of a Rigaku Oxford Diffraction Synergy-S diffractometer equipped with a HyPix6000HE detector and operating with CuK $\alpha$  radiation. The data collection routine, unit cell refinement, and data processing were carried out with the program



CrysAlisPro.<sup>10</sup> The Laue symmetry and systematic absences were consistent with the orthorhombic space group *Cccm* (#63). However, based on the structure of **1**-DMF (CCDC 2324985), we know that this space group occurs from pseudomerohedral twinning of space group *P2/c*. Unfortunately, this sample exhibited both multi-crystal (i.e., nonmerohedral) and pseudomerohedral twinning. As a result, we were unable to obtain suitable quality data to refine in *P2/c*. Therefore, our only option was to process as the orthorhombic pseudomerohedral twin and refine as disordered in *Cccm*. The structure was solved using SHELXT<sup>11</sup> and refined using SHELXL<sup>12</sup> via Olex2.<sup>13</sup> The capping ligands of the paddlewheel complex are modeled as water but are likely a combination of water and DMSO. A 2-position disorder model was used for the anthracene fragments with relative occupancies constrained to 50% by symmetry. The solvent mask feature of OLEX2, was used to subtract out a total of 835 e<sup>-</sup>, equivalent to ~20 DMSO molecules (840 e<sup>-</sup>) from 2698 Å<sup>3</sup> total void space per unit cell, or ~1.25 DMSO per asymmetric unit. The final refinement model involved anisotropic displacement parameters for non-hydrogen atoms and a riding model for all hydrogen atoms.

**Table S1** Crystal and structure refinement data for **1-DMA**, **1-DMF**, **1-DMSO**, and **2**

|                                                 | <b>1-DMA</b>                                                                   | <b>1-DMF</b>                                                                           | <b>1-DMSO</b>                                                                  | <b>2</b>                                                          |
|-------------------------------------------------|--------------------------------------------------------------------------------|----------------------------------------------------------------------------------------|--------------------------------------------------------------------------------|-------------------------------------------------------------------|
| Empirical Formula                               | C <sub>64</sub> H <sub>67</sub> Cu <sub>2</sub> N <sub>5</sub> O <sub>13</sub> | C <sub>60.5</sub> H <sub>60.5</sub> Cu <sub>2</sub> N <sub>5.5</sub> O <sub>15.5</sub> | C <sub>54</sub> H <sub>52</sub> Cu <sub>2</sub> O <sub>15</sub> S <sub>5</sub> | C <sub>34</sub> H <sub>39</sub> N <sub>4</sub> O <sub>8</sub> Zn  |
| Formula Weight                                  | 1241.3                                                                         | 1239.72                                                                                | 1228.33                                                                        | 697.06                                                            |
| Temperature/K                                   | 100.00(10)                                                                     | 100.0(2)                                                                               | 99.9(3)                                                                        | 100.0(2)                                                          |
| Radiation                                       | Cu K $\alpha$                                                                  | Mo K $\alpha$                                                                          | Cu K $\alpha$                                                                  | Cu K $\alpha$                                                     |
| Wavelength                                      | 1.54184                                                                        | 0.71073                                                                                | 1.54184                                                                        | 1.54184                                                           |
| Crystal System                                  | monoclinic                                                                     | monoclinic                                                                             | orthorhombic                                                                   | orthorhombic                                                      |
| Space Group                                     | P2 <sub>1</sub> /n                                                             | P2/c                                                                                   | Cccm                                                                           | Fdd2                                                              |
| <i>a</i> /Å                                     | 10.7147(2)                                                                     | 19.1907(3)                                                                             | 10.4087(3)                                                                     | 38.9726(6)                                                        |
| <i>b</i> /Å                                     | 37.1847(6)                                                                     | 14.79129(19)                                                                           | 36.7583(8)                                                                     | 24.8157(5)                                                        |
| <i>c</i> /Å                                     | 14.7691(2)                                                                     | 22.8997(6)                                                                             | 15.4789(4)                                                                     | 13.8024(2)                                                        |
| $\alpha$ /°                                     | 90                                                                             | 90                                                                                     | 90                                                                             | 90                                                                |
| $\beta$ /°                                      | 92.982(2)                                                                      | 107.262(2)                                                                             | 90                                                                             | 90                                                                |
| $\gamma$ /°                                     | 90                                                                             | 90                                                                                     | 90                                                                             | 90                                                                |
| <i>V</i> /Å <sup>3</sup>                        | 5876.38(17)                                                                    | 6207.4(2)                                                                              | 5922.3(3)                                                                      | 13348.7(4)                                                        |
| <i>Z</i>                                        | 4                                                                              | 4                                                                                      | 4                                                                              | 16                                                                |
| $\rho_{\text{calc}}$ g/cm <sup>3</sup>          | 1.403                                                                          | 1.327                                                                                  | 1.378                                                                          | 1.387                                                             |
| $\mu$ /mm <sup>-1</sup>                         | 1.467                                                                          | 0.754                                                                                  | 3.055                                                                          | 1.498                                                             |
| <i>F</i> (000)                                  | 2592.0                                                                         | 2576                                                                                   | 2536.0                                                                         | 5840                                                              |
| Crystal size/mm <sup>3</sup>                    | 0.09 × 0.07 ×<br>0.04                                                          | 0.262 × 0.162 ×<br>0.123                                                               | 0.15 × 0.07 ×<br>0.02                                                          | 0.16 × 0.09 ×<br>0.06                                             |
| Reflections coll.                               | 47605                                                                          | 29748                                                                                  | 31846                                                                          | 30940                                                             |
| Independent refl.                               | 11844                                                                          | 29748                                                                                  | 3226                                                                           | 6325                                                              |
| <i>R</i> <sub>int</sub> value                   | 0.0622                                                                         |                                                                                        | 0.0808                                                                         | 0.0485                                                            |
| GooF                                            | 1.048                                                                          | 1.076                                                                                  | 1.077                                                                          | 1.048                                                             |
| R indices [ <i>I</i> > 2 $\sigma$ ( <i>I</i> )] | <i>R</i> <sub>1</sub> = 0.0555<br><i>wR</i> <sub>2</sub> = 0.1421              | <i>R</i> <sub>1</sub> = 0.1000<br><i>wR</i> <sub>2</sub> = 0.2859                      | <i>R</i> <sub>1</sub> = 0.0671<br><i>wR</i> <sub>2</sub> = 0.1987              | <i>R</i> <sub>1</sub> = 0.0762<br><i>wR</i> <sub>2</sub> = 0.2121 |
| R indices (all data)                            | <i>R</i> <sub>1</sub> = 0.0698<br><i>wR</i> <sub>2</sub> = 0.1491              | <i>R</i> <sub>1</sub> = 0.1418<br><i>wR</i> <sub>2</sub> = 0.3179                      | <i>R</i> <sub>1</sub> = 0.0758<br><i>wR</i> <sub>2</sub> = 0.2056              | <i>R</i> <sub>1</sub> = 0.0801<br><i>wR</i> <sub>2</sub> = 0.2194 |

## E. MOF Structures

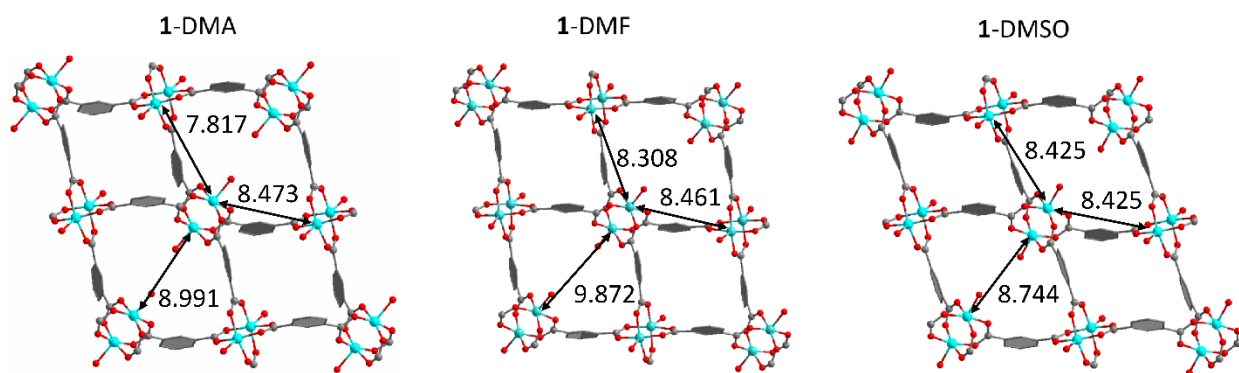

**Figure S20** Metal-isophthalate layers present in **1-5** with nearest Cu-Cu distance measurements labeled. Metal-isophthalate layers span the third dimension through bianthracenyl moieties extending from the 5-position of each isophthalate group

$\text{Cu}_2\text{BADI-DMA}$

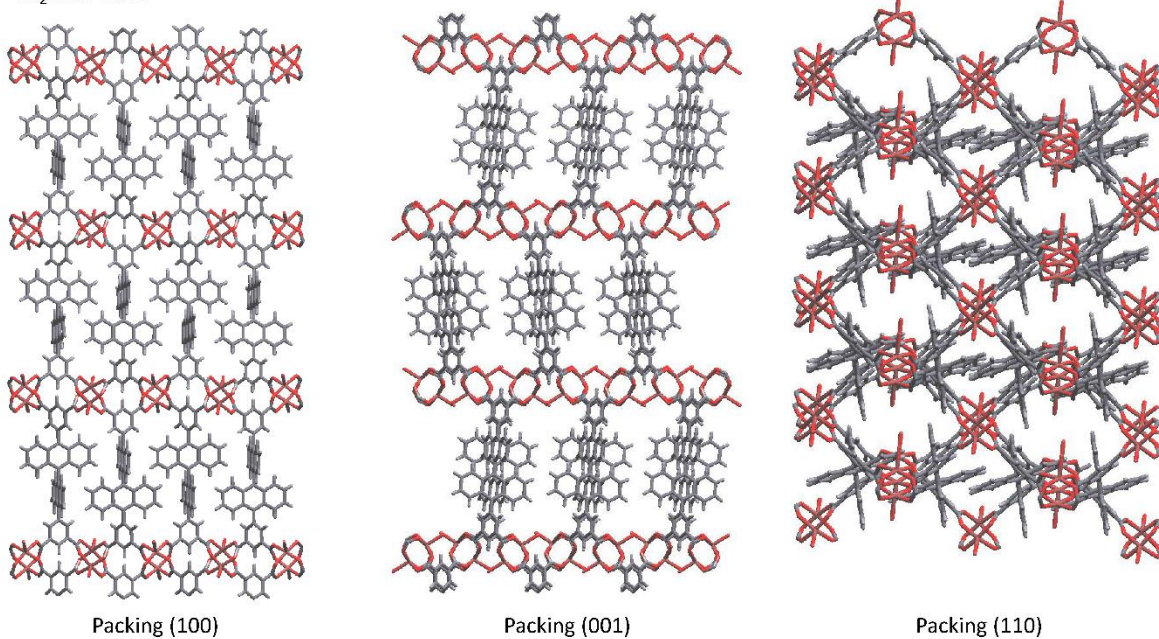

**Figure S21** Crystal packing in **1-DMA**

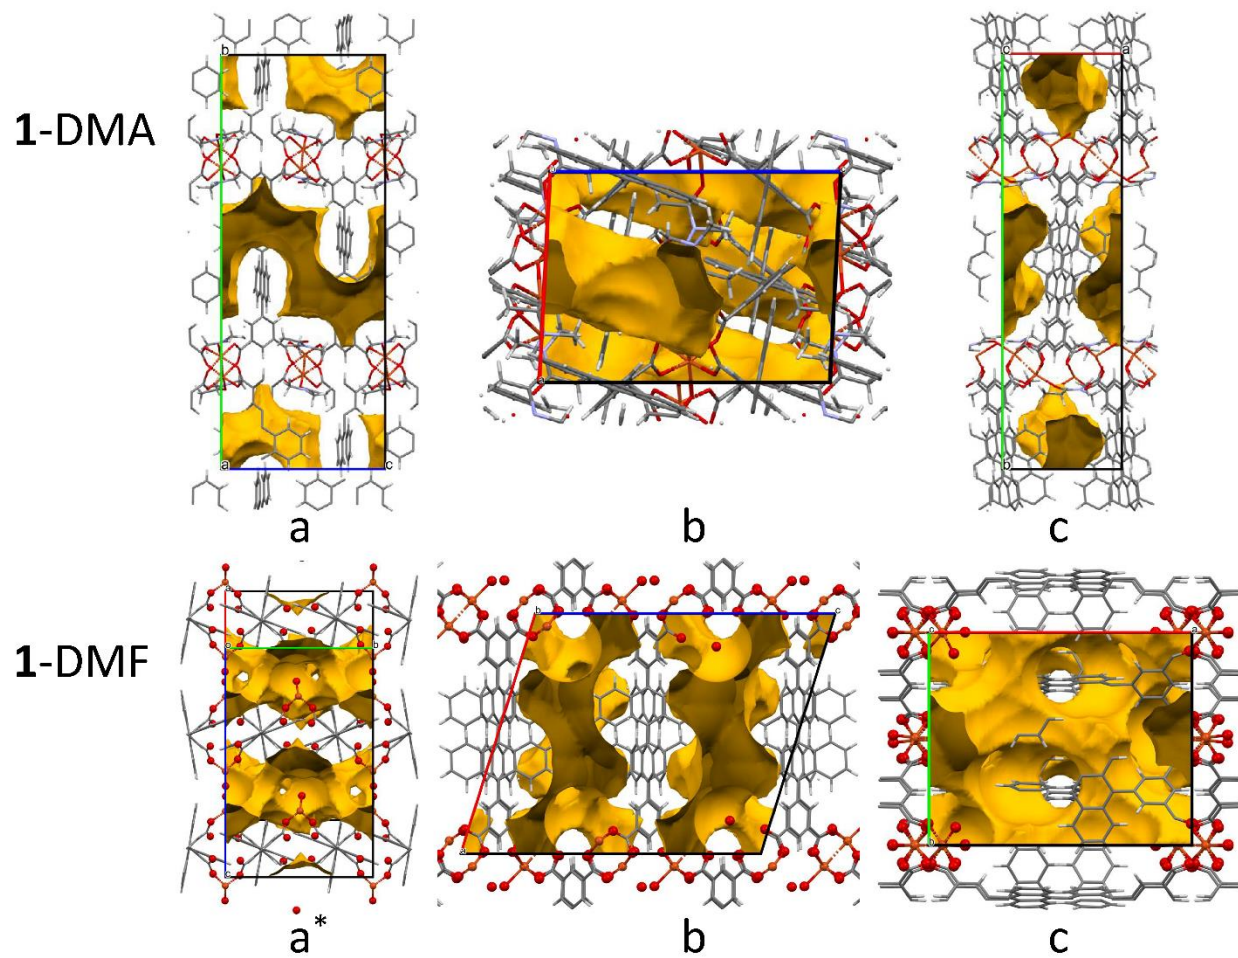

**Figure S22** Solvent-accessible voids in **1-DMA** and **-DMF** as calculated using the *Mercury* program with spherical probe with 1.2 Å radius.<sup>14</sup>

**Table S2** Unit cell parameters of 1-5

| Crystal           | $a$ (Å) | $b$ (Å)  | $c$ (Å) | $\alpha$ (°) | $\beta$ (°) | $\gamma$ (°) | $V$ (Å <sup>3</sup> ) |
|-------------------|---------|----------|---------|--------------|-------------|--------------|-----------------------|
| 1-DMA             | 10.7147 | 37.1847  | 14.7691 | 90           | 92.982      | 90           | 5876.38               |
| 1-DMF             | 19.1907 | 14.79129 | 22.8997 | 90           | 107.262     | 90           | 6207.42               |
| 1-DMF<br>(ortho)* | 11.3494 | 36.6729  | 14.7750 | 90           | 90          | 90           | 6149.58               |
| 1-DMSO            | 10.4087 | 36.7583  | 15.4789 | 90           | 90          | 90           | 5922.32               |

\*1-DMF(ortho) = 1-DMF structure solved and refined in the orthorhombic space group *Cccm*

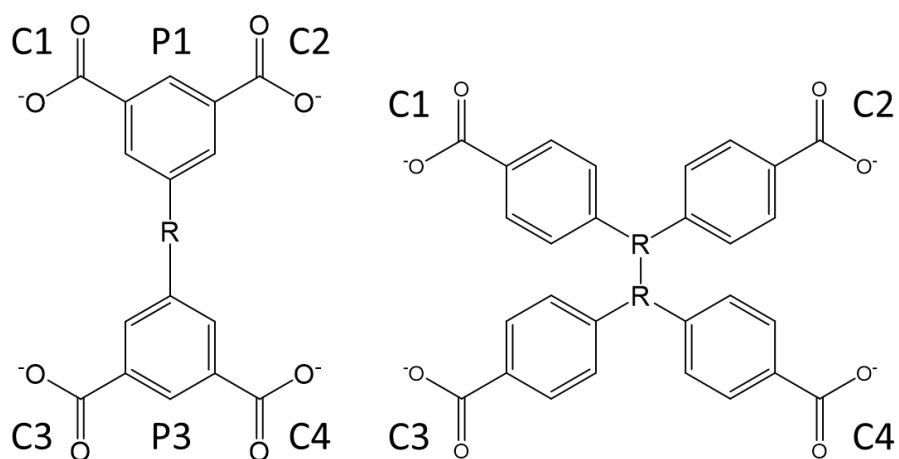

**Figure S23** Labeling system used for identifying dihedral angles between planes prepared from O-C-O atoms in carboxylates (C1 – C4) and carbon atoms in phenyl rings (P1 and P3) in diisophthalate (left) and tetrabenzoate (right) ligands

**Table S3** Dihedral angles between planes generated from carboxylates and phenyl (isophthalate) rings in several MOFs composed of dicopper paddlewheel and diisophthalate-containing ligands. Previously-reported MOFs are grouped by net topology. Labeling system presented in Figure S23

| MOF                                 | Space Group             | Dihedral Angles between planes (degrees) |       |       |       |       |       |       |       |       |       |       |       |       |       |       |
|-------------------------------------|-------------------------|------------------------------------------|-------|-------|-------|-------|-------|-------|-------|-------|-------|-------|-------|-------|-------|-------|
|                                     |                         | P1 P3                                    | P1 C1 | P1 C2 | P1 C3 | P1 C4 | P3 C1 | P3 C2 | P3 C3 | P3 C4 | C1 C2 | C1 C3 | C1 C4 | C2 C3 | C2 C4 | C3 C4 |
| 1-DMA                               | <i>P2<sub>1</sub>/n</i> | 80                                       | 38    | 26    | 88    | 86    | 79    | 87    | 32    | 32    | 54    | 87    | 54    | 66    | 86    | 59    |
| 1-DMF                               | <i>P2/c</i>             | 82                                       | 30    | 24    | 88    | 82    | 85    | 87    | 29    | 33    | 48    | 89    | 59    | 68    | 83    | 56    |
| 1-DMF (ortho)                       | <i>Cccm</i>             | 82                                       | 29    | 29    | 86    | 86    | 86    | 86    | 29    | 29    | 52    | 87    | 64    | 64    | 87    | 52    |
| 1-DMSO                              | <i>Cccm</i>             | 70                                       | 33    | 33    | 87    | 87    | 87    | 87    | 33    | 33    | 57    | 87    | 66    | 66    | 87    | 57    |
| <b>Nbo/fof* MOFs</b>                |                         |                                          |       |       |       |       |       |       |       |       |       |       |       |       |       |       |
| ZJU-105 <sup>1</sup>                | <i>R-3m</i>             | 0                                        | 5     | 5     | 5     | 5     | 5     | 5     | 5     | 5     | 6     | 6     | 0     | 0     | 6     | 6     |
| NOTT-102 <sup>15</sup>              | <i>R-3m</i>             | 0                                        | 7     | 7     | 7     | 7     | 7     | 7     | 7     | 7     | 8     | 8     | 0     | 0     | 8     | 8     |
| Cu <sub>2</sub> ADEDA <sup>16</sup> | <i>R-3m</i>             | 0                                        | 5     | 5     | 5     | 5     | 5     | 5     | 5     | 5     | 7     | 7     | 0     | 0     | 7     | 7     |
| PCN-14 <sup>17</sup>                | <i>R-3c</i>             | 0                                        | 6     | 8     | 8     | 6     | 6     | 8     | 8     | 6     | 12    | 12    | 0     | 0     | 12    | 12    |
| <b>ssb/stx* MOF</b>                 |                         |                                          |       |       |       |       |       |       |       |       |       |       |       |       |       |       |
| NOTT-109 <sup>15</sup>              | <i>I4/mmm</i>           | 18                                       | 18    | 18    | 34    | 34    | 34    | 34    | 18    | 18    | 22    | 46    | 52    | 52    | 46    | 22    |

\*Topologies presented as net formed from treatment of the ligand as four-connected node and two three-connected nodes [ie, (net from 4-c ligand)/(net from (3-c)<sup>2</sup> ligand)]

**Table S4** Dihedral angles between planes generated from carboxylates in several MOFs composed of dicopper paddlewheel and tetrabenzoate-containing ligands and **1-S** (reproduced from Table S3). All MOFs reported in Table S4 have **pts**-net topology except Cu<sub>2</sub>TCPDPA (*Imma*), which is **lvt**-net topology. Labeling system presented in Figure S23

| MOF                                  | Space Group             | Dihedral Angles between Planes (degrees) |            |            |            |            |            |
|--------------------------------------|-------------------------|------------------------------------------|------------|------------|------------|------------|------------|
|                                      |                         | C1 C2                                    | C1 C3      | C1 C4      | C2 C3      | C2 C4      | C3 C4      |
| PCN-39m <sup>18</sup>                | <i>C2/c</i>             | 36                                       | 52         | 78         | 78         | 52         | 51         |
| PCN-39t <sup>18</sup>                | <i>P-1</i>              | 44                                       | 50         | 80         | 86         | 51         | 50         |
| PCN-38 <sup>18,†</sup>               | <i>P-1</i>              | 49<br>(52)                               | 46<br>(44) | 81<br>(80) | 81<br>(83) | 61<br>(70) | 53<br>(36) |
| Cu <sub>2</sub> TCPDPA <sup>19</sup> | <i>Cccm</i>             | 66                                       | 86         | 58         | 58         | 86         | 66         |
| Cu <sub>2</sub> TCPDPA <sup>19</sup> | <i>Imma</i> *           | 63                                       | 63         | 0          | 0          | 63         | 63         |
| <b>1</b> -DMA                        | <i>P2<sub>1</sub>/n</i> | 60                                       | 87         | 54         | 67         | 87         | 54         |
| <b>1</b> -DMF                        | <i>P2/c</i>             | 53                                       | 88         | 65         | 65         | 88         | 53         |
| <b>1</b> -DMF<br>(ortho)             | <i>Cccm</i>             | 52                                       | 88         | 64         | 64         | 88         | 52         |
| <b>1</b> -DMSO                       | <i>Cccm</i>             | 57                                       | 87         | 66         | 66         | 87         | 57         |

<sup>†</sup>PCN-38 contains two ligands in the asymmetric unit. Angles are reported between groups within one ligand. Angles for the second ligand are reported in parentheses.

\*Cu<sub>2</sub>TCPDPA (*Imma*) adopts an **lvt**-net topology, though previously reported as **nbo**



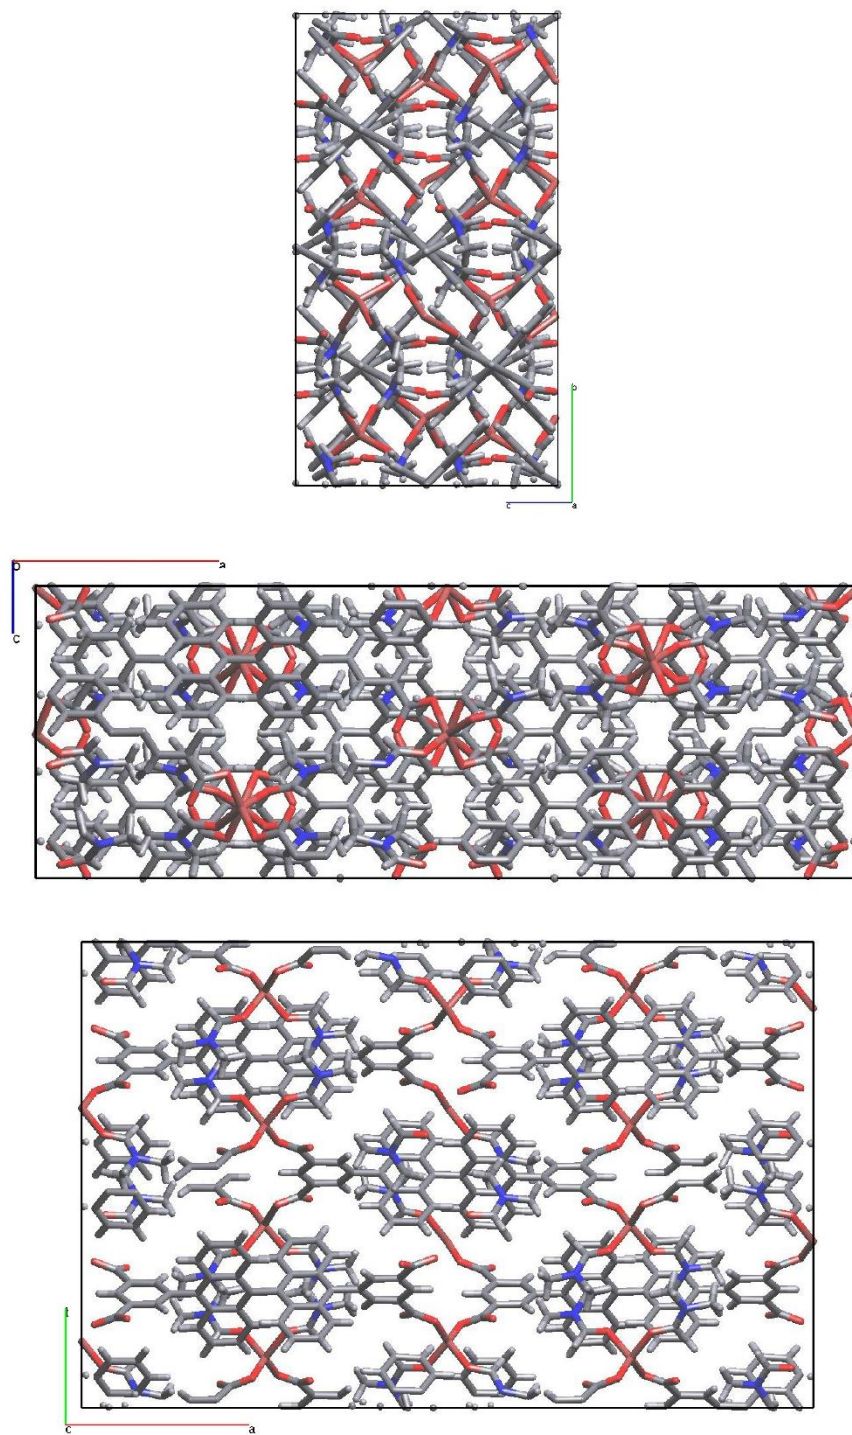

**Figure S24** Crystal packing in **2** viewed down the *a*- (top), *b*- (middle), and *c*-axes (bottom). Noncoordinated solvent molecules are removed for clarity. Rose = zinc, red = oxygen, blue = nitrogen, dark gray = carbon, light gray = hydrogen.



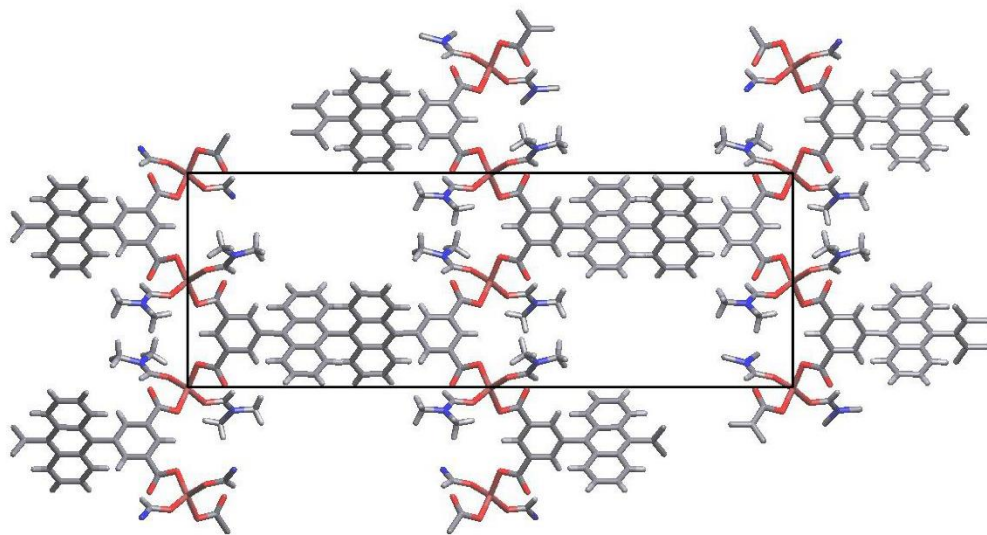

**Figure S25** Single  $\text{Zn}_2\text{BADI}(\text{DMF})_2$  2-D layer in **2** viewed down the  $b$ -axis.

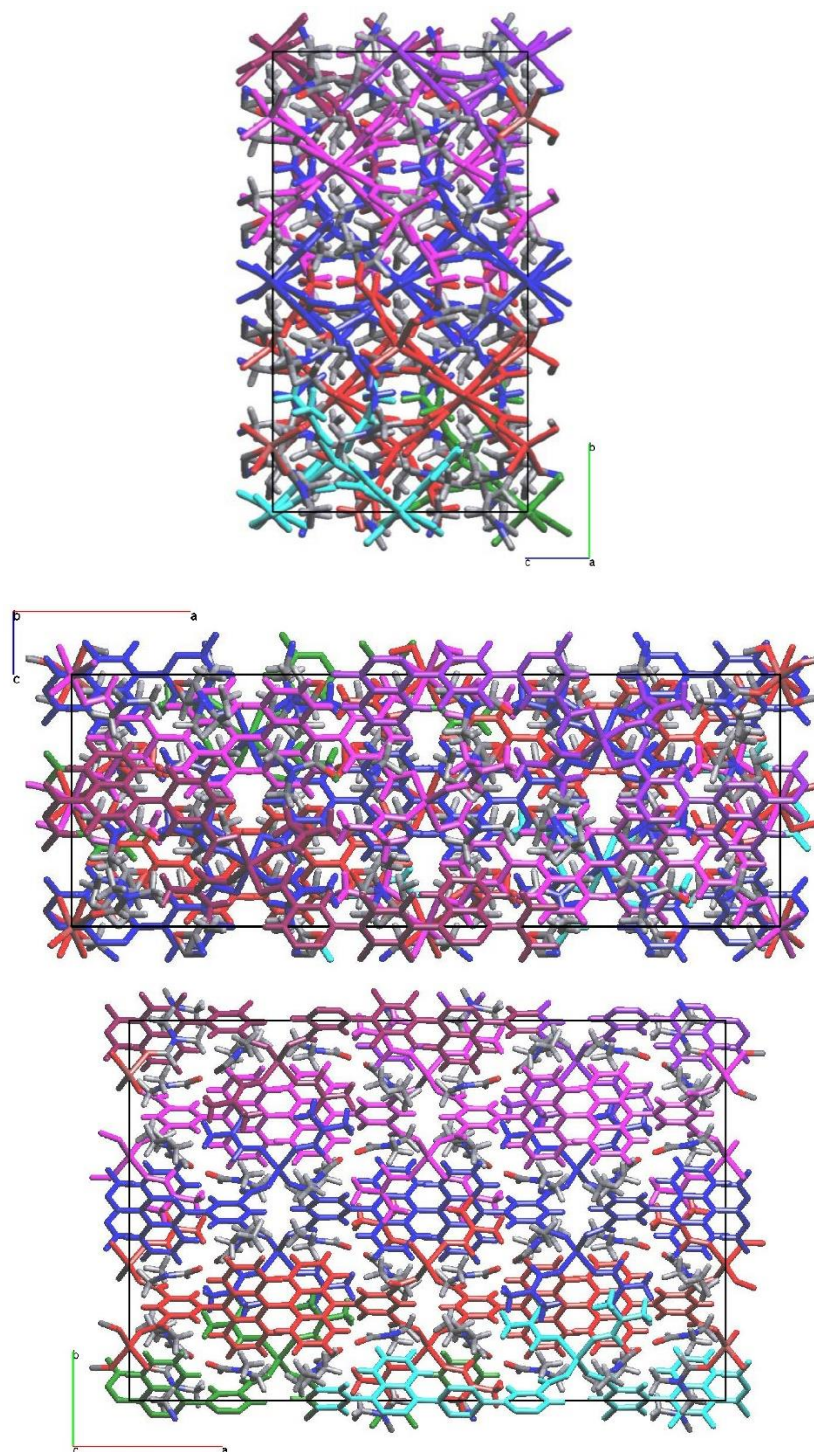

**Figure S26** Crystal packing in Zn<sub>2</sub>BADl viewed down the *a*- (top), *b*- (middle), and *c*-axes. Separate 2-D layers are represented as individual colors to highlight positions of free-solvent molecules. Dark gray = carbon, blue(individual atoms) = nitrogen, red(individual atoms) = oxygen, light gray = hydrogen.

## F. PXRD Data

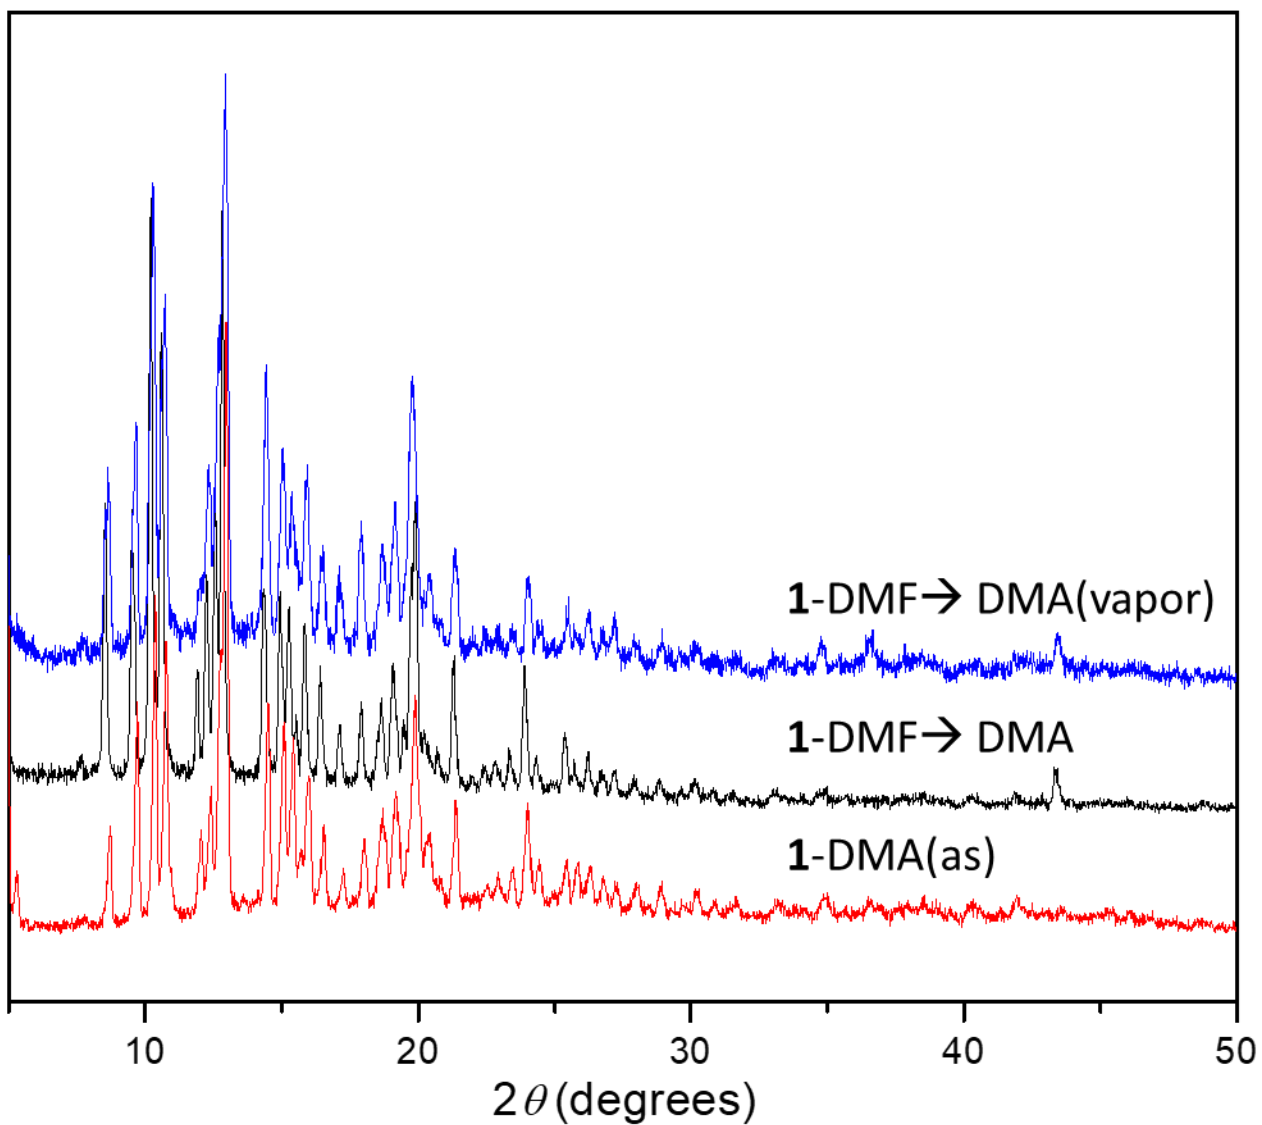

**Figure S27** PXRD patterns of **1-DMF** after soaking in DMA compared to **1-DMA(as)** ( $1-S_1 \rightarrow S_2 = 1-S_1$  soaked in  $S_2$  for 18 h at 85 °C)

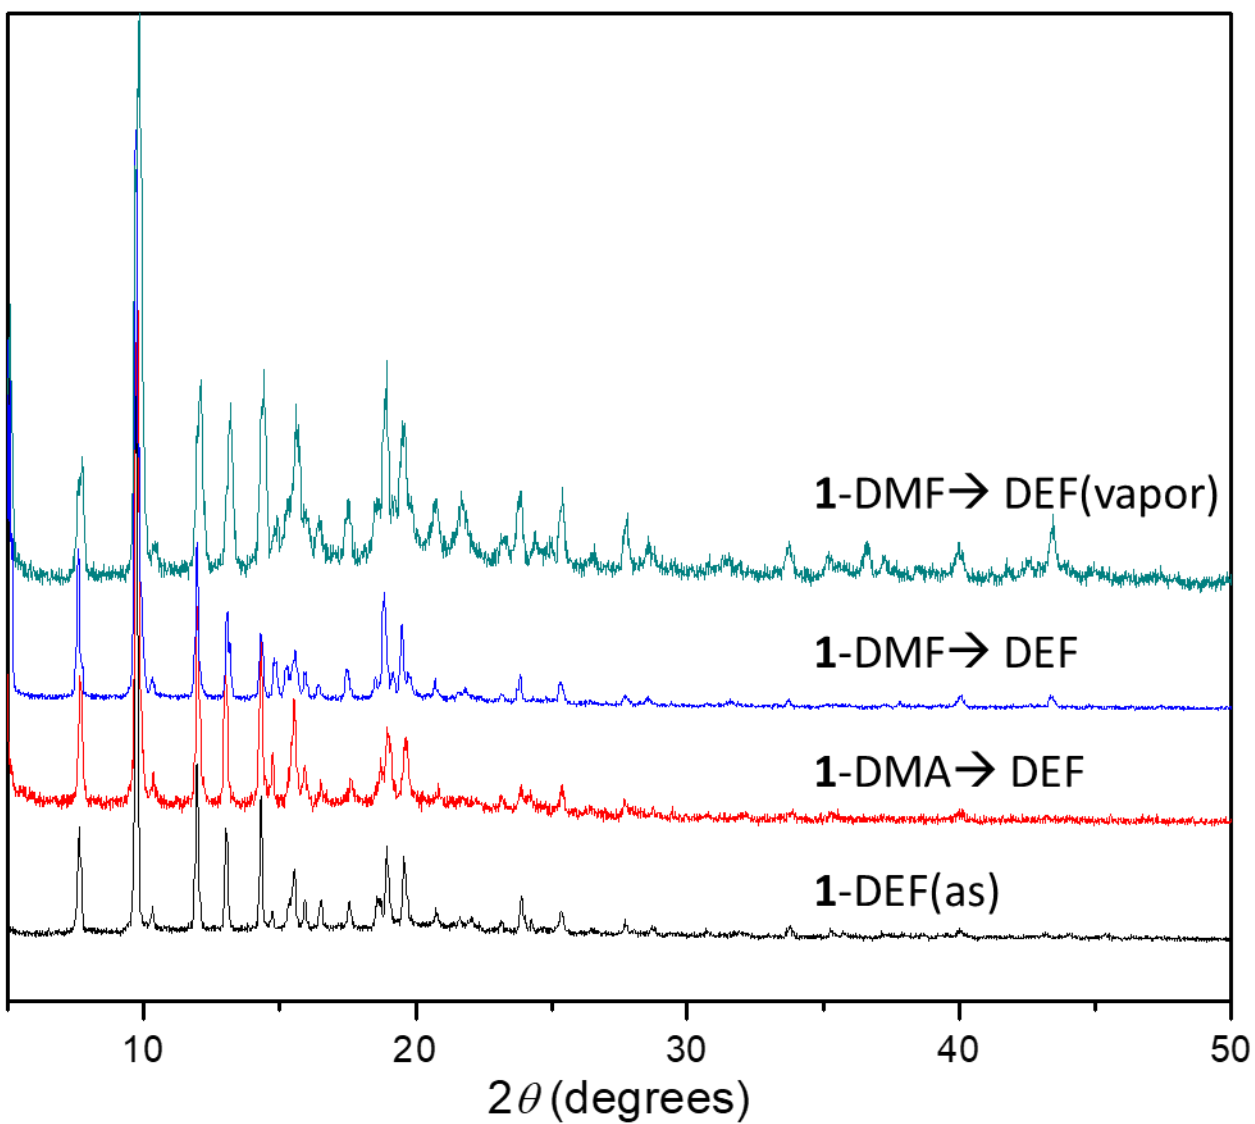

**Figure S28** PXRD patterns of **1-S** after soaking in DEF compared to **1-DMA(as)** ( $1-S_1 \rightarrow S_2 = 1-S_1$  soaked in  $S_2$  for 18 h at 85 °C), and **1-DMF** exposed to DEF vapor at 85 °C for 18 h

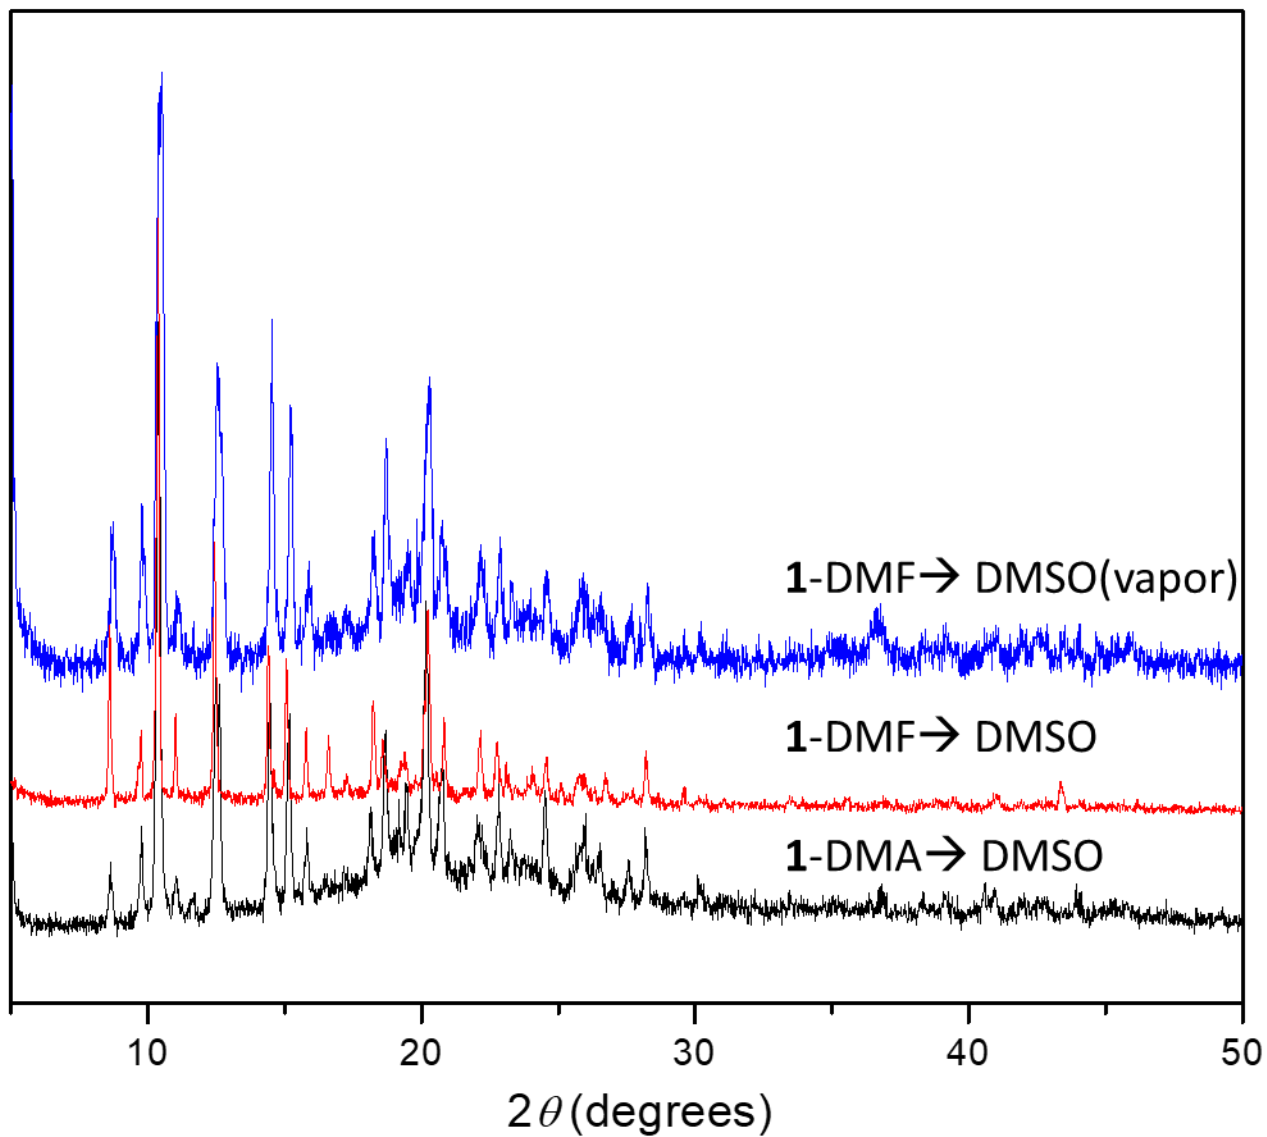

**Figure S29** PXRD patterns of **1-S** after soaking in DMSO ( $1-S_1 \rightarrow S_2 = 1-S_1$  soaked in  $S_2$  for 18 h at 85 °C), and **1-DMF** exposed to DMSO vapor at 85 °C for 18 h

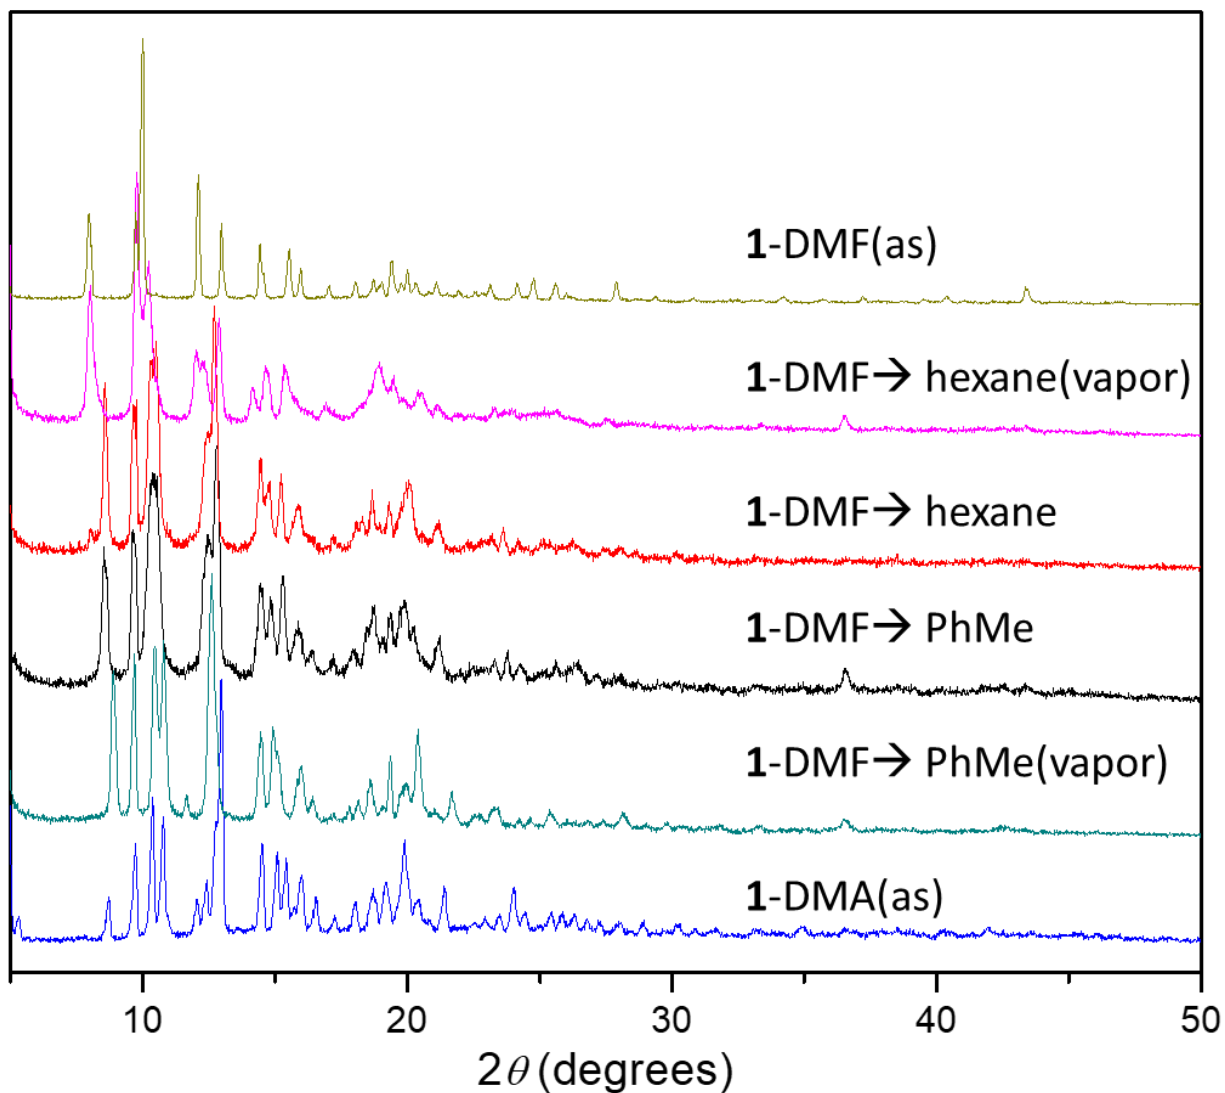

**Figure S30** PXR D patterns of **1-DMF** after soaking in nonpolar solvent, or exposed to nonpolar solvent vapor compared to **1-DMA(as)** and **1-DMF(as)**. Samples exposed to toluene (PhMe) were heated at 85 °C, while those exposed to hexane were kept at ambient temperature.

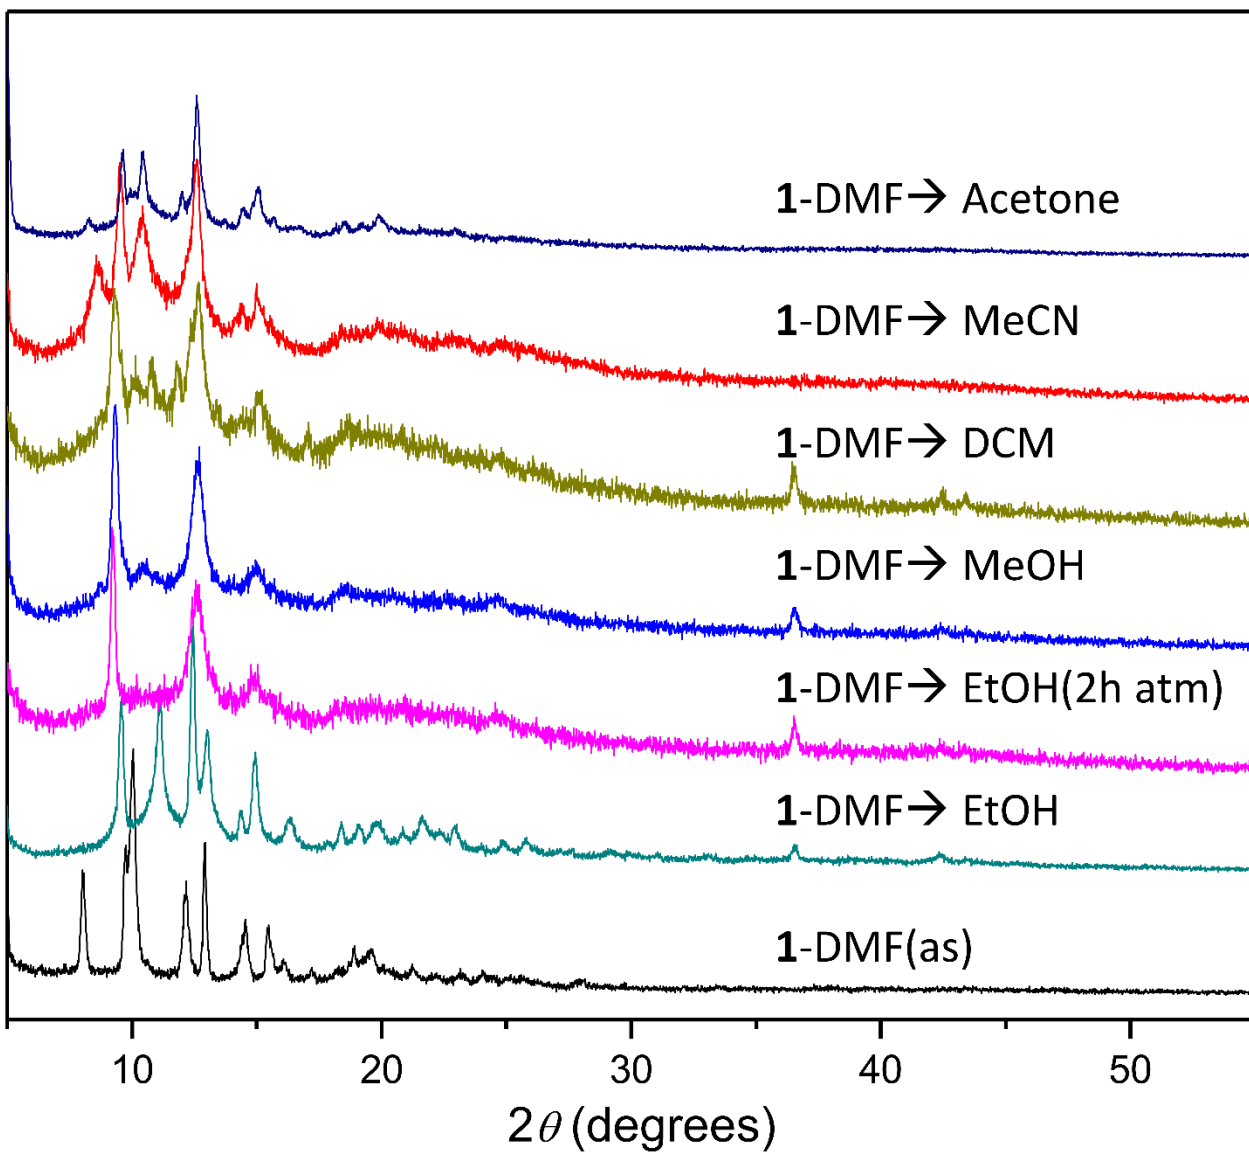

**Figure S31** PXRD patterns of **1-S** after soaking in volatile, polar solvent ( $1-S_1 \rightarrow S_2 = 1-S_1$  soaked in  $S_2$  for 18 h at ambient temperature). “1-DMF  $\rightarrow$  EtOH(2h atm)” = 1-DMF  $\rightarrow$  EtOH after 2 hours exposure to atmospheric conditions in the laboratory.

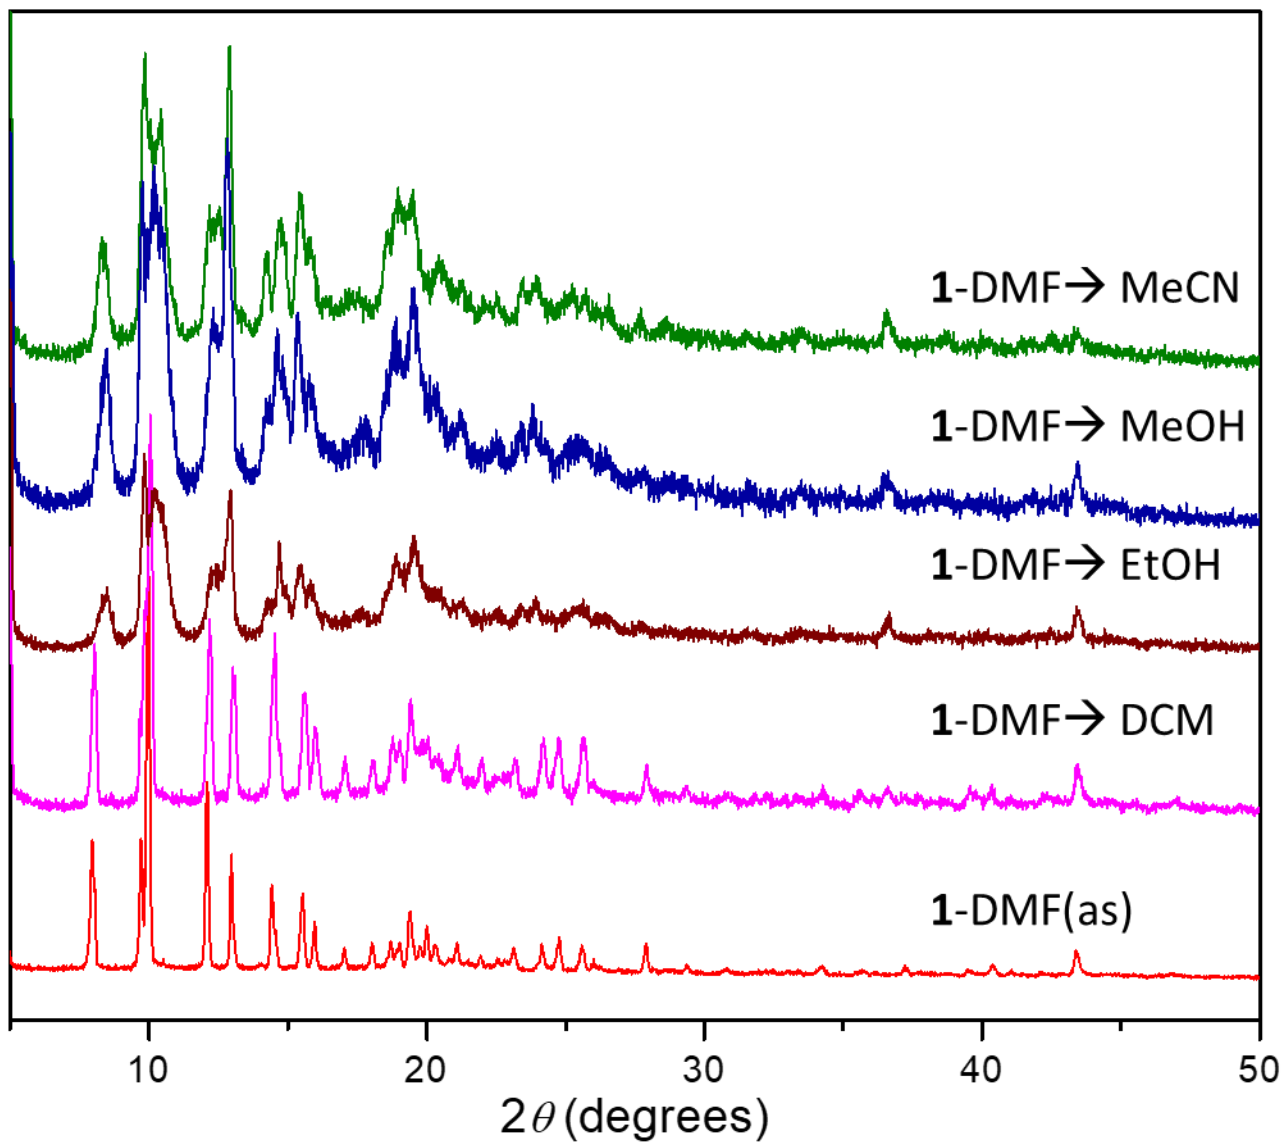

**Figure S32** PXRD patterns of **1-S** after exposure to volatile, polar solvent vapor (**1-S<sub>1</sub>**  $\rightarrow$  **S<sub>2</sub>** = **1-S<sub>1</sub>** exposed to **S<sub>2</sub>** vapor for 18 h at ambient temperature)



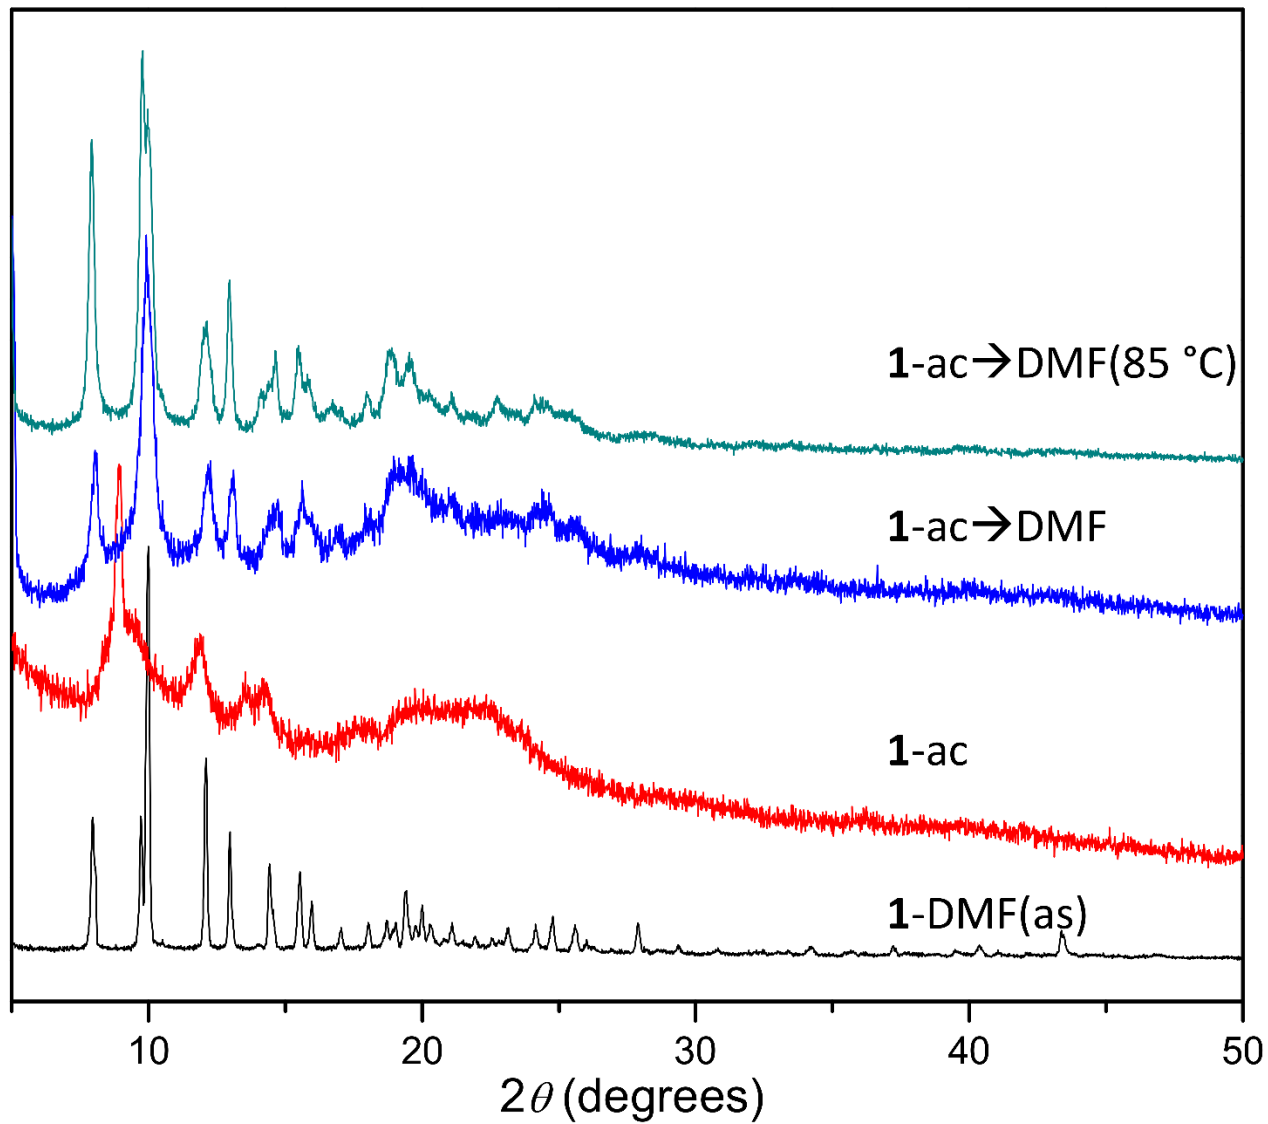

**Figure S33** PXRD patterns of **1-DMF** after activation (**1-ac**), and the activated sample soaked in DMF at room temperature for 18 h (**1-ac $\rightarrow$ DMF**) and heated at 85 °C in DMF for 24 h (**1-ac $\rightarrow$ DMF(85 °C)**).

### G. Thermogravimetric Analysis Data

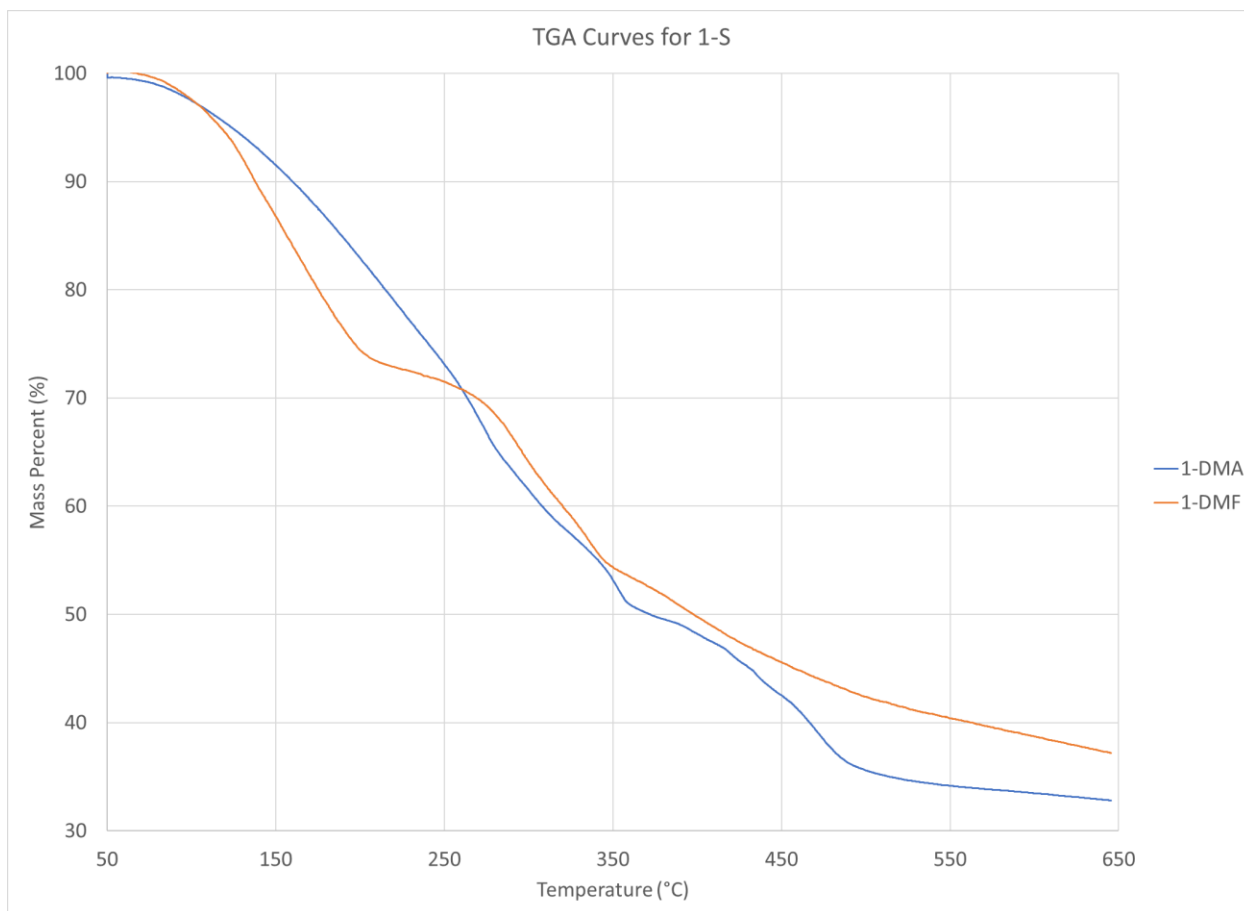

Figure S34 TGA curves for 1-DMA and 1-DMF

## H. Gas Sorption Isotherms

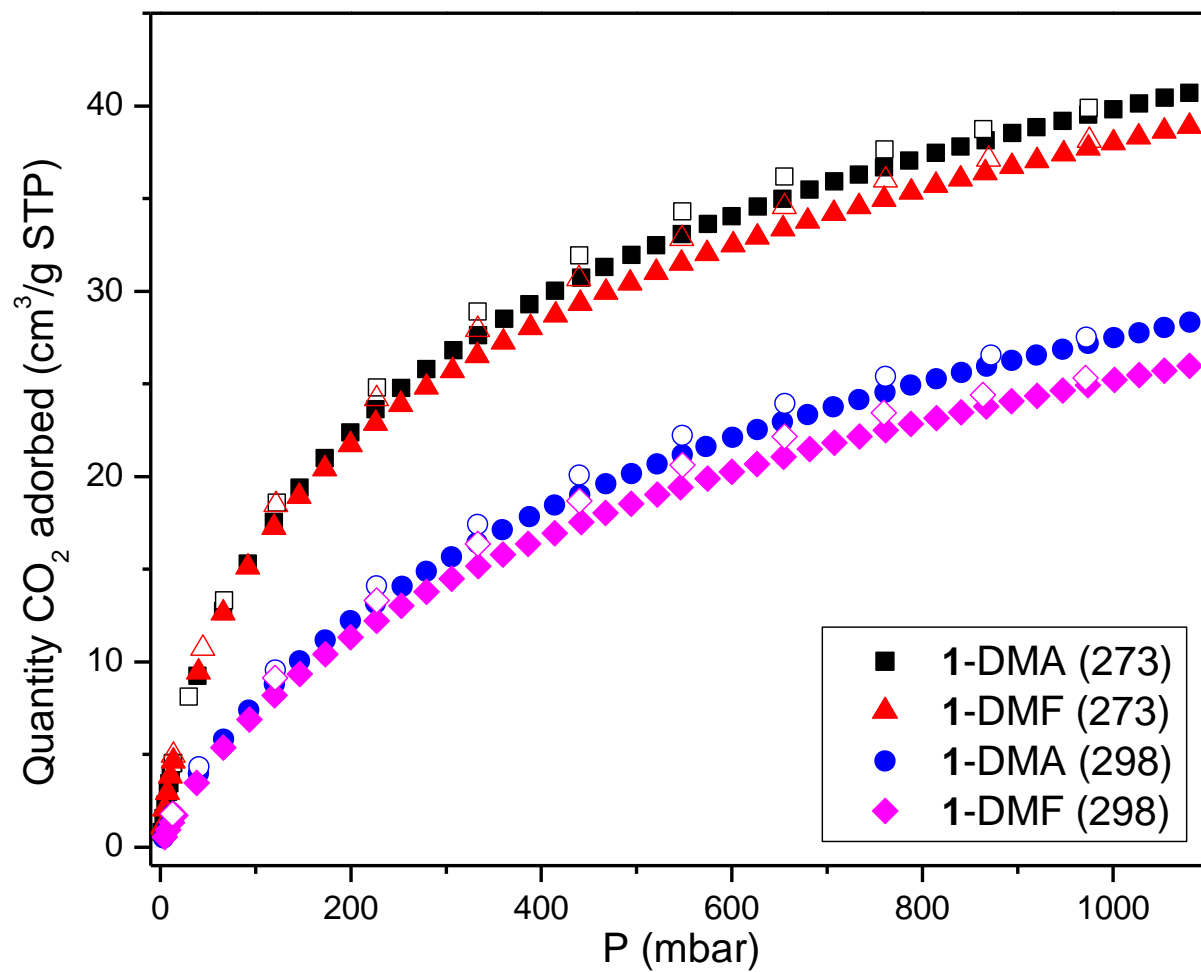

**Figure S35** CO<sub>2</sub> sorption isotherms for **1-DMA** and **1-DMF** at 273 K and 298 K. Full symbols = adsorption, empty symbols = desorption

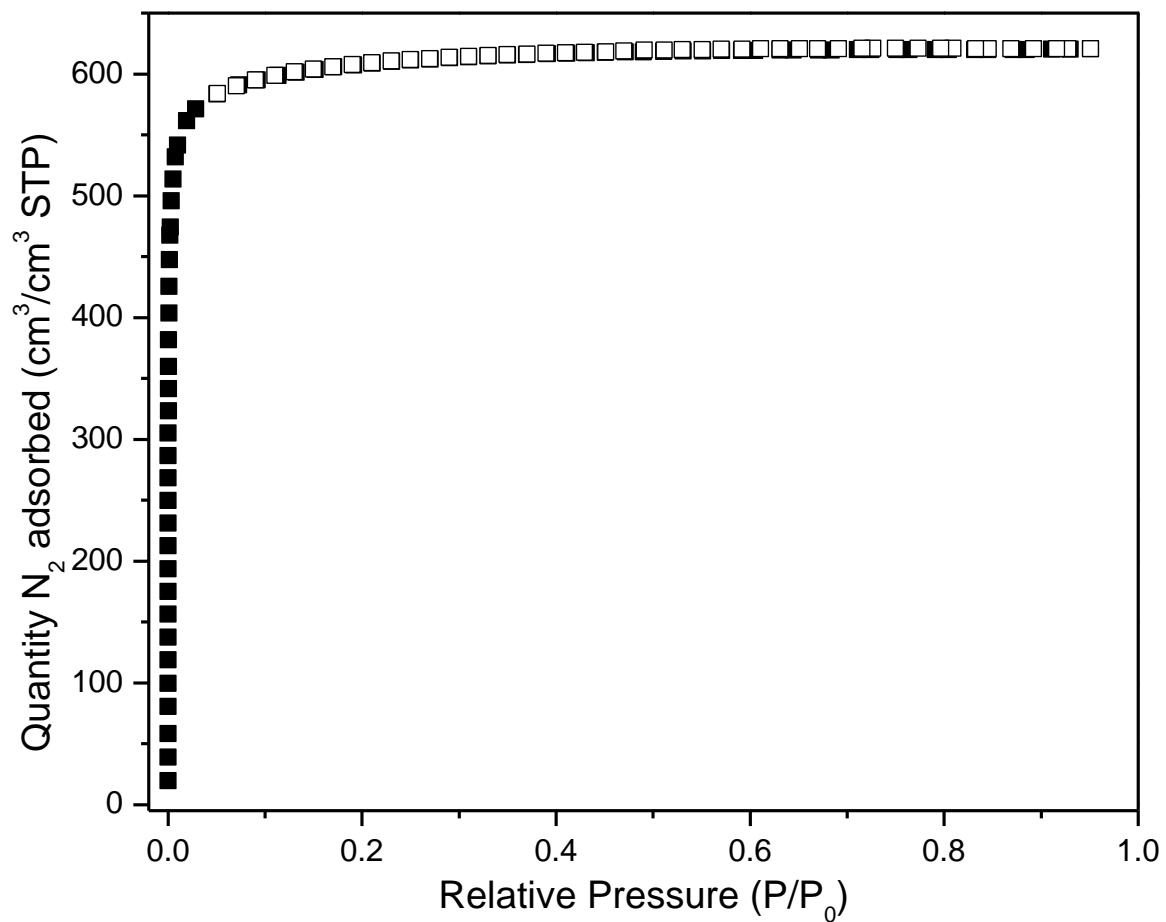

**Figure S36** N<sub>2</sub> sorption isotherms for ZJU-105 at 77 K. Full symbols = adsorption, empty symbols = desorption. ZJU-105 was activated according to Ref 1.

## I. Infrared Spectra

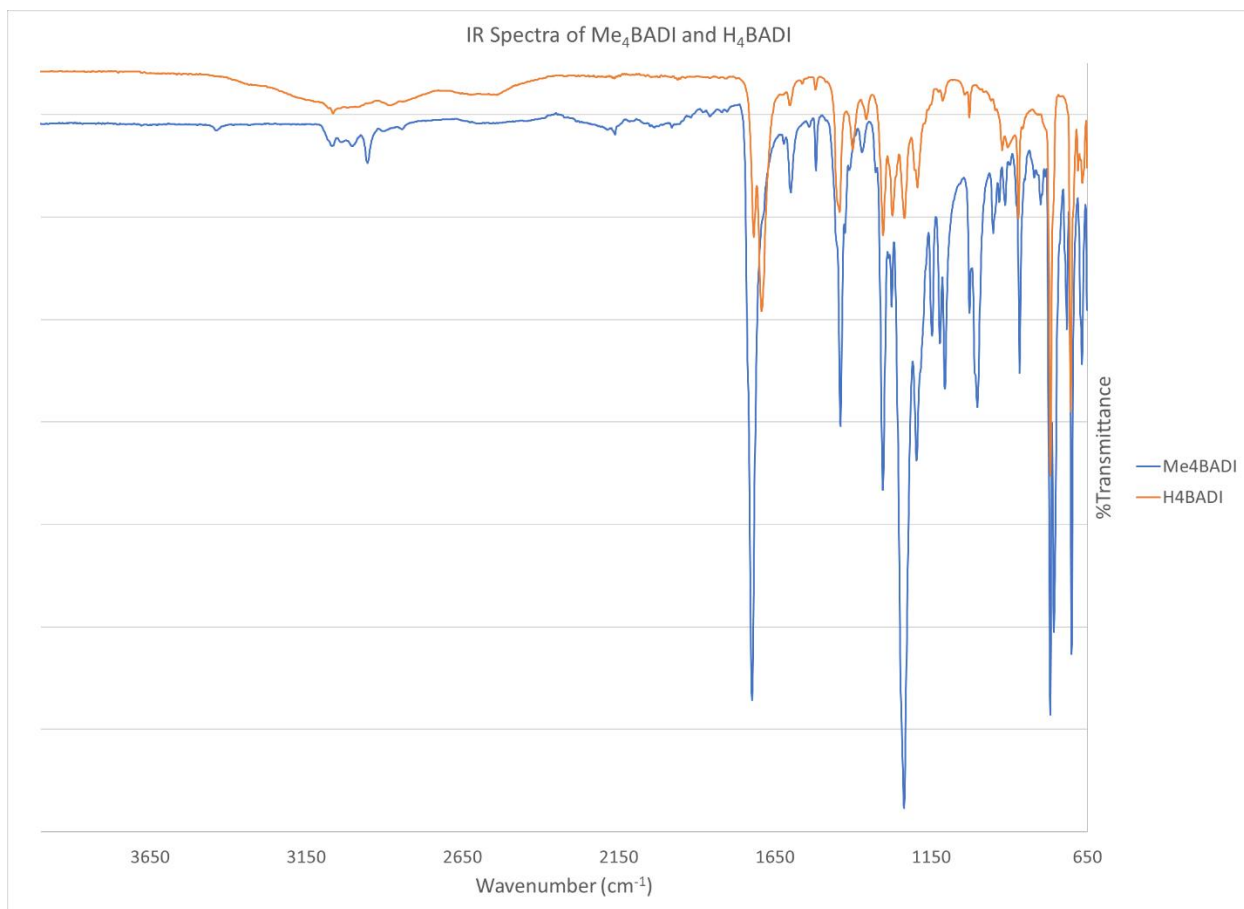

Figure S37 Infrared spectra of Me<sub>4</sub>BADI and H<sub>4</sub>BADI

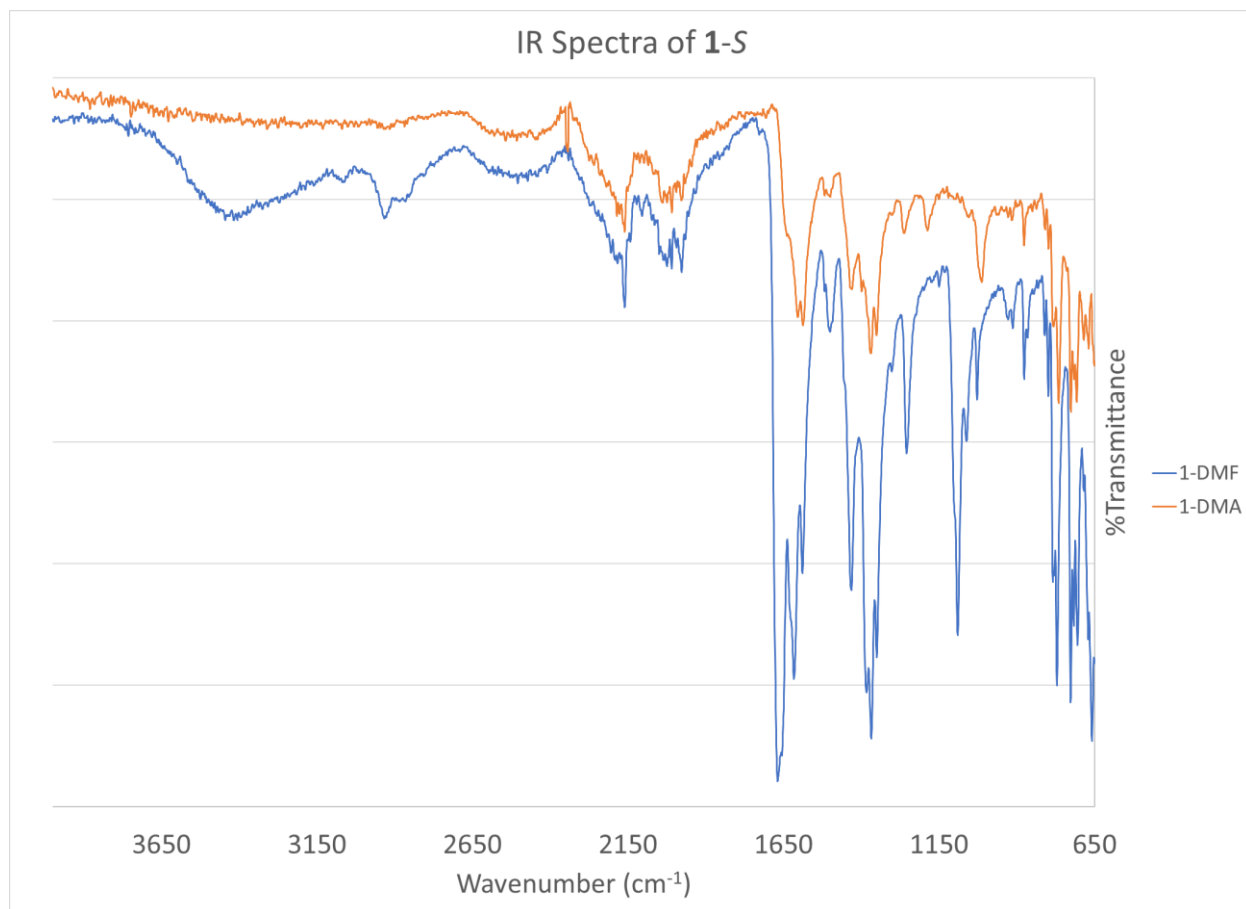

**Figure S38** Infrared spectra of **1-DMA** and **1-DMF**

## J. References

1. K. Shao, J. Pei, J.-X. Wang, Y. Yang, Y. Cui, W. Zhou, T. Yildirim, B. Li, B. Chen and G. Qian, *Chem. Commun.*, 2019, **55**, 11402-11405.
2. J. Jiao, H. Liu, D. Bai and Y. He, *Inorg. Chem.*, 2016, **55**, 3974-3979.
3. G. Ricciardi, A. Rosa, G. Morelli and F. Leij, *Polyhedron*, 1991, **10**, 955-961.
4. T. Chen, J.-H. Dou, L. Yang, C. Sun, N. J. Libretto, G. Skorupskii, J. T. Miller and M. Dincă, *J. Am. Chem. Soc.*, 2020, **142**, 12367-12373.
5. Q. Jiang, P. Xiong, J. Liu, Z. Xie, Q. Wang, X.-Q. Yang, E. Hu, Y. Cao, J. Sun, Y. Xu and L. Chen, *Angew. Chem. Int. Ed.*, 2020, **59**, 5273-5277.
6. M. G. Campbell, D. Sheberla, S. F. Liu, T. M. Swager and M. Dincă, *Angew. Chem. Int. Ed.*, 2015, **54**, 4349-4352.
7. J. Muzart, *Tetrahedron*, 2009, **65**, 8313-8323.
8. J. L. Bras and J. Muzart, in *Solvents as Reagents in Organic Synthesis*, ed. X.-F. W. Wu, 2017, DOI: <https://doi.org/10.1002/9783527805624.ch6>, pp. 199-314.
9. Y. Jiang, I. Oh, S. H. Joo, Y.-S. Seo, S. H. Lee, W. K. Seong, Y. J. Kim, J. Hwang, S. K. Kwak, J.-W. Yoo and R. S. Ruoff, *J. Am. Chem. Soc.*, 2020, **142**, 18346-18354.
10. CrysAlisPro Software System, v1.171.42.xx, R. O. Diffraction, **2022**, Rigaku Corporation, Oxford, UK.
11. G. M. Sheldrick, *Acta Cryst. A*, 2015, **71**, 3-8.
12. G. M. Sheldrick, *Acta Cryst. C*, 2015, **71**, 3-8.
13. O. V. Dolomanov, L. J. Bourhis, R. J. Gildea, J. A. K. Howard and H. Puschmann, *J. Appl. Crystallogr.*, 2009, **42**, 339-341.
14. C. F. Macrae, I. Sovago, S. J. Cottrell, P. T. A. Galek, P. McCabe, E. Pidcock, M. Platings, G. P. Shields, J. S. Stevens, M. Towler and P. A. Wood, *J. Appl. Crystallogr.*, 2020, **53**, 226-235.
15. X. Lin, I. Telepeni, A. J. Blake, A. Dailly, C. M. Brown, J. M. Simmons, M. Zoppi, G. S. Walker, K. M. Thomas, T. J. Mays, P. Hubberstey, N. R. Champness and M. Schröder, *J. Am. Chem. Soc.*, 2009, **131**, 2159-2171.
16. J. Zhao, R. Lin, W. Tian, X. Zhu, X. Luo and Y. Liu, *Cryst. Growth Des.*, 2023, **23**, 4417-4423.
17. S. Ma, D. Sun, J. M. Simmons, C. D. Collier, D. Yuan and H.-C. Zhou, *J. Am. Chem. Soc.*, 2008, **130**, 1012-1016.
18. T. A. Makal, W. Zhuang and H.-C. Zhou, *J. Mater. Chem. A*, 2013, **1**, 13502-13509.
19. D. Sun, Y. Ke, T. M. Mattox, B. A. Ooro and H.-C. Zhou, *Chem. Commun.*, 2005, 5447-5449.
